# Supplementary material
Source: Royal Society of Chemistry journal article supplement (doi:10.1039/d6cp01952h)
Supplement: d6cp01952h1.pdf [file d6cp01952h1.pdf]

**How Fluorination Collapses Inversion Barriers and Increases  
Electrophilicity in Bicyclo[1.1.0]butanes**

**Supporting Information**

**Bruno A. Piscelli, Caio E. D. V. P. Nascimento, Rodrigo A. Cormanich\***

Universidade Estadual de Campinas, Instituto de Química, Departamento de Química  
Orgânica, PO Box 6154 – 13083-970 – Campinas, São Paulo, Brazil.

\*E-mail: [cormanich@unicamp.br](mailto:cormanich@unicamp.br)

# Table of Contents

|                                                                                                                                                                                                                                                                                                                                                                                                                |    |
|----------------------------------------------------------------------------------------------------------------------------------------------------------------------------------------------------------------------------------------------------------------------------------------------------------------------------------------------------------------------------------------------------------------|----|
| Table S1. Benchmark calculations done at several DFT levels and using DLPNO-CCSD(T) level as the benchmark for the inversion barrier of BCB, 1-FBCB and 2-FBCB. R, TS and P indicate the "reactants", transition states and "products", respectively. Energies are given in kcal mol <sup>-1</sup> .....                                                                                                       | 3  |
| Figure S1. Displacement vectors corresponding to the imaginary modes for all conformational transition states investigated for the BCB derivatives.....                                                                                                                                                                                                                                                        | 6  |
| Table S2. NBO analysis relative energies (in kcal mol <sup>-1</sup> ) obtained at the B3LYP/6-311+G** level for several fluoro-bicyclobutane derivatives. Compounds that may exhibit <i>cis-trans</i> isomerism were also calculated. $\Delta E^\ddagger_T$ is the electronic, $\Delta E^\ddagger_L$ the Lewis, and $\Delta E^\ddagger_{NL}$ the non-Lewis energy contributions to the inversion barrier. .... | 7  |
| Table S3. Pairwise steric exchange energies $\Delta E_{(i,j)}$ (kcal mol <sup>-1</sup> ) and associated pre-NLMO overlaps $S(i,j)$ (au) for interactions between NLMOs (i, j) as obtained by Natural Steric analysis at the B3LYP/6-311+G** level for BCB(Min). ....                                                                                                                                           | 8  |
| Table S4. Pairwise steric exchange energies $\Delta E_{(i,j)}$ (kcal mol <sup>-1</sup> ) and associated pre-NLMO overlaps $S(i,j)$ (au) for interactions between NLMOs (i, j) as obtained by Natural Steric analysis at the B3LYP/6-311+G** level for BCB(TS). ....                                                                                                                                            | 9  |
| Table S5. Pairwise steric exchange energies $\Delta E_{(i,j)}$ (kcal mol <sup>-1</sup> ) and associated pre-NLMO overlaps $S(i,j)$ (au) for interactions between NLMOs (i, j) as obtained by Natural Steric analysis at the B3LYP/6-311+G** level for 1-FBCB(Min). ....                                                                                                                                        | 10 |
| Table S6. Pairwise steric exchange energies $\Delta E_{(i,j)}$ (kcal mol <sup>-1</sup> ) and associated pre-NLMO overlaps $S(i,j)$ (au) for interactions between NLMOs (i, j) as obtained by Natural Steric analysis at the B3LYP/6-311+G** level for 1-FBCB(TS). ....                                                                                                                                         | 11 |
| Table S7. Pairwise steric exchange energies $\Delta E_{(i,j)}$ (kcal mol <sup>-1</sup> ) and associated pre-NLMO overlaps $S(i,j)$ (au) for interactions between NLMOs (i, j) as obtained by Natural Steric analysis at the B3LYP/6-311+G** level for 2-FBCB(Min). ....                                                                                                                                        | 12 |
| Table S8. Pairwise steric exchange energies $\Delta E_{(i,j)}$ (kcal mol <sup>-1</sup> ) and associated pre-NLMO overlaps $S(i,j)$ (au) for interactions between NLMOs (i, j) as obtained by Natural Steric analysis at the B3LYP/6-311+G** level for 2-FBCB(TS). ....                                                                                                                                         | 13 |
| Table S9. Experimental conversion rates (Baran <i>et al</i> <sup>7</sup> ) and calculated LUMO (au), $\Delta H^\ddagger(TS_N)$ (kcal mol <sup>-1</sup> ) and $\Delta G^\ddagger(TS_N)$ (kcal mol <sup>-1</sup> ) for the reaction of dibenzylamine with sulfonylated BCBs.....                                                                                                                                 | 14 |
| Optimised Cartesian Coordinates .....                                                                                                                                                                                                                                                                                                                                                                          | 15 |

**Table S1.** Benchmark calculations done at several DFT levels and using DLPNO-CCSD(T) level as the benchmark for the inversion barrier of **BCB**, **1-FBCB** and **2-FBCB**. R, TS and P indicate the "reactants", transition states and "products", respectively. Energies are given in kcal mol<sup>-1</sup>.

|                      | BCB |            |            |            | 1F-BCB |            |            |            | 2F-BCB |            |            |            |
|----------------------|-----|------------|------------|------------|--------|------------|------------|------------|--------|------------|------------|------------|
|                      |     | $\Delta E$ | $\Delta H$ | $\Delta G$ |        | $\Delta E$ | $\Delta H$ | $\Delta G$ |        | $\Delta E$ | $\Delta H$ | $\Delta G$ |
| DLPNO-CCSD(T)/CBS    | R   | 0.00       | -          | -          | R      | 0.00       | -          | -          | R      | 0.00       | -          | -          |
|                      | TS  | 64.14      | -          | -          | TS     | 49.70      | -          | -          | TS     | 50.69      | -          | -          |
|                      | P   | 0.00       | -          | -          | P      | 0.00       | -          | -          | P      | -3.28      | -          | -          |
| B3LYP/6-311+G**      | R   | 0.00       | 0.00       | 0.00       | R      | 0.00       | 0.00       | 0.00       | R      | 0.00       | 0.00       | 0.00       |
|                      | TS  | 73.97      | 71.8       | 71.75      | TS     | 54.04      | 52.34      | 52.18      | TS     | 51.75      | 50.12      | 49.96      |
|                      | P   | 0.00       | 0.00       | 0.00       | P      | 0.00       | 0.00       | 0.00       | P      | -3.11      | -2.84      | -2.77      |
| B3LYP/aug-cc-pVTZ    | R   | 0.00       | 0.00       | 0.00       | R      | 0.00       | 0.00       | 0.00       | R      | 0.00       | 0.00       | 0.00       |
|                      | TS  | 74.63      | 72.43      | 72.38      | TS     | 54.02      | 52.29      | 52.17      | TS     | 52.86      | 51.22      | 51.09      |
|                      | P   | 0.00       | 0.00       | 0.00       | P      | 0.00       | 0.00       | 0.00       | P      | -3.06      | -2.77      | -2.70      |
| B3LYP-D3/6-311+G**   | R   | 0.00       | 0.00       | 0.00       | R      | 0.00       | 0.00       | 0.00       | R      | 0.00       | 0.00       | 0.00       |
|                      | TS  | 74.09      | 71.87      | 71.80      | TS     | 54.23      | 52.52      | 52.33      | TS     | 51.81      | 50.12      | 49.94      |
|                      | P   | 0.00       | 0.00       | 0.00       | P      | 0.00       | 0.00       | 0.00       | P      | -3.14      | -2.87      | -2.79      |
| B3LYP-D3/aug-cc-pVTZ | R   | 0.00       | 0.00       | 0.00       | R      | 0.00       | 0.00       | 0.00       | R      | 0.00       | 0.00       | 0.00       |
|                      | TS  | 74.76      | 72.51      | 72.45      | TS     | 54.21      | 52.46      | 52.32      | TS     | 52.94      | 51.24      | 51.1       |
|                      | P   | -0.00      | 0.00       | 0.00       | P      | 0.00       | 0.00       | 0.00       | P      | -3.09      | -2.8       | -2.72      |
| BHandH/6-311+G**     | R   | 0.00       | 0.00       | 0.00       | R      | 0.00       | 0.00       | 0.00       | R      | 0.00       | 0.00       | 0.00       |
|                      | TS  | 88.73      | 86.59      | 86.55      | TS     | 66.47      | 64.75      | 64.75      | TS     | 66.91      | 65.27      | 65.26      |
|                      | P   | 0.00       | 0.00       | 0.00       | P      | 0.00       | 0.00       | 0.00       | P      | -2.89      | -2.59      | -2.51      |
| BHandH/aug-cc-pVTZ   | R   | 0.00       | 0.00       | 0.00       | R      | 0.00       | 0.00       | 0.00       | R      | 0.00       | 0.00       | 0.00       |
|                      | TS  | 89.21      | 87.00      | 86.97      | TS     | 65.99      | 64.22      | 64.24      | TS     | 67.87      | 66.18      | 66.18      |
|                      | P   | 0.00       | 0.00       | 0.00       | P      | 0.00       | 0.00       | 0.00       | P      | -2.81      | -2.50      | -2.41      |
| M06-L/6-311+G**      | R   | 0.00       | 0.00       | 0.00       | R      | 0.00       | 0.00       | 0.00       | R      | 0.00       | 0.00       | 0.00       |
|                      | TS  | 80.36      | 78.25      | 78.21      | TS     | 57.48      | 55.87      | 55.86      | TS     | 59.88      | 58.16      | 57.98      |
|                      | P   | 0.00       | 0.00       | 0.00       | P      | 0.00       | 0.00       | 0.00       | P      | -2.79      | -2.52      | -2.43      |

**Table S1:** (continuation).

|                        | BCB        |            |            |       | 1F-BCB     |            |            | 2F-BCB     |            |            |       |       |
|------------------------|------------|------------|------------|-------|------------|------------|------------|------------|------------|------------|-------|-------|
|                        | $\Delta E$ | $\Delta H$ | $\Delta G$ |       | $\Delta E$ | $\Delta H$ | $\Delta G$ | $\Delta E$ | $\Delta H$ | $\Delta G$ |       |       |
| M06-L/aug-cc-pVTZ      | R          | 0.00       | 0.00       | 0.00  | R          | 0.00       | 0.00       | 0.00       | R          | 0.00       | 0.00  | 0.00  |
|                        | TS         | 80.63      | 78.5       | 78.47 | TS         | 57.33      | 55.73      | 55.74      | TS         | 60.93      | 59.28 | 59.17 |
|                        | P          | 0.00       | 0.00       | 0.00  | P          | 0.00       | 0.00       | 0.00       | P          | -2.82      | -2.51 | -2.4  |
| PBE0/6-311+G**         | R          | 0.00       | 0.00       | 0.00  | R          | 0.00       | 0.00       | 0.00       | R          | 0.00       | 0.00  | 0.00  |
|                        | TS         | 79.83      | 77.69      | 77.65 | TS         | 58.23      | 56.54      | 56.51      | TS         | 58.64      | 56.99 | 56.93 |
|                        | P          | 0.00       | 0.00       | 0.00  | P          | 0.00       | 0.00       | 0.00       | P          | -2.95      | -2.67 | -2.59 |
| PBE0/aug-cc-pVTZ       | R          | 0.00       | 0.00       | 0.00  | R          | 0.00       | 0.00       | 0.00       | R          | 0.00       | 0.00  | 0.00  |
|                        | TS         | 80.31      | 78.11      | 78.09 | TS         | 57.96      | 56.23      | 56.23      | TS         | 59.61      | 57.93 | 57.89 |
|                        | P          | 0.00       | 0.00       | 0.00  | P          | 0.00       | 0.00       | 0.00       | P          | -2.89      | -2.6  | -2.52 |
| M06-2X/6-311+G**       | R          | 0.00       | 0.00       | 0.00  | R          | 0.00       | 0.00       | 0.00       | R          | 0.00       | 0.00  | 0.00  |
|                        | TS         | 86.07      | 84.03      | 84.01 | TS         | 63.86      | 62.26      | 62.35      | TS         | 65.61      | 63.94 | 63.93 |
|                        | P          | 0.00       | 0.00       | 0.00  | P          | 0.00       | 0.00       | 0.00       | P          | -3.02      | -2.73 | -2.64 |
| M06-2X/aug-cc-pVTZ     | R          | 0.00       | 0.00       | 0.00  | R          | 0.00       | 0.00       | 0.00       | R          | 0.00       | 0.00  | 0.00  |
|                        | TS         | 86.09      | 84.02      | 84.01 | TS         | 63.16      | 61.53      | 61.63      | TS         | 65.78      | 64.1  | 64.09 |
|                        | P          | 0.00       | 0.00       | 0.00  | P          | 0.00       | 0.00       | 0.00       | P          | -3.01      | -2.72 | -2.62 |
| CAM-B3LYP/6-311+G**    | R          | 0.00       | 0.00       | 0.00  | R          | 0.00       | 0.00       | 0.00       | R          | 0.00       | 0.00  | 0.00  |
|                        | TS         | 80.69      | 78.6       | 78.55 | TS         | 60.04      | 58.38      | 58.3       | TS         | 58.05      | 56.43 | 56.31 |
|                        | P          | 0.00       | 0.00       | 0.00  | P          | 0.00       | 0.00       | 0.00       | P          | 0.00       | 0.01  | 0.00  |
| CAM-B3LYP/aug-cc-pVTZ  | R          | 0.00       | 0.00       | 0.00  | R          | 0.00       | 0.00       | 0.00       | R          | 0.00       | 0.00  | 0.00  |
|                        | TS         | 81.15      | 79.02      | 78.98 | TS         | 59.72      | 58.02      | 57.98      | TS         | 58.97      | 57.31 | 57.21 |
|                        | P          | 0.00       | 0.00       | 0.00  | P          | 0.00       | 0.00       | 0.00       | P          | 0.00       | 0.00  | 0.00  |
| CAM-B3LYP-D3/6-311+G** | R          | 0.00       | 0.00       | 0.00  | R          | 0.00       | 0.00       | 0.00       | R          | 0.00       | 0.00  | 0.00  |
|                        | TS         | 80.71      | 78.6       | 78.55 | TS         | 60.09      | 58.42      | 58.33      | TS         | 58.05      | 56.4  | 56.28 |
|                        | P          | 0.00       | 0.00       | 0.00  | P          | 0.00       | 0.00       | 0.00       | P          | -3.11      | -2.84 | -2.76 |

**Table S1:** (continuation).

|                          | BCB       |            |            |            | 1F-BCB    |            |            |            | 2F-BCB    |            |            |            |
|--------------------------|-----------|------------|------------|------------|-----------|------------|------------|------------|-----------|------------|------------|------------|
|                          |           | $\Delta E$ | $\Delta H$ | $\Delta G$ |           | $\Delta E$ | $\Delta H$ | $\Delta G$ |           | $\Delta E$ | $\Delta H$ | $\Delta G$ |
| CAM-B3LYP-D3/aug-cc-pVTZ | <b>R</b>  | 0.00       | 0.00       | 0.00       | <b>R</b>  | 0.00       | 0.00       | 0.00       | <b>R</b>  | 0.00       | 0.00       | 0.00       |
|                          | <b>TS</b> | 81.17      | 79.02      | 78.98      | <b>TS</b> | 59.77      | 58.07      | 58.02      | <b>TS</b> | 58.97      | 57.3       | 57.2       |
|                          | <b>P</b>  | 0.00       | 0.00       | 0.00       | <b>P</b>  | 0.00       | 0.00       | 0.00       | <b>P</b>  | 0.00       | 0.00       | 0.00       |

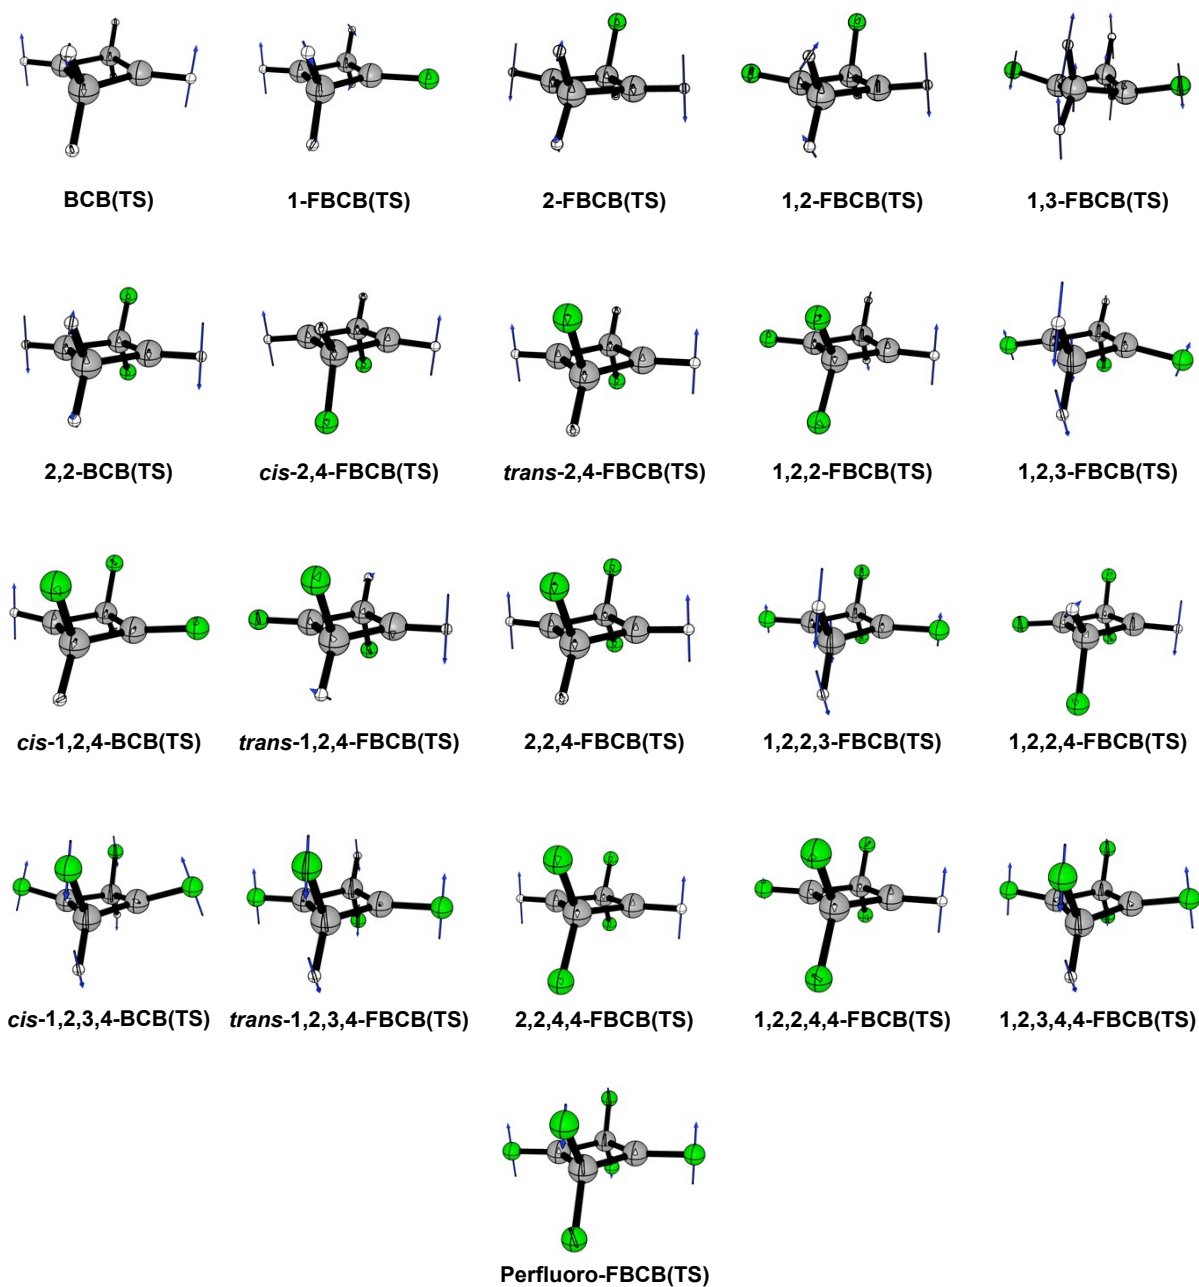

**Figure S1.** Displacement vectors corresponding to the imaginary modes for all conformational transition states investigated for the BCB derivatives. Calculations at the B3LYP/6-311+G\*\* level.

**Table S2.** NBO analysis relative energies (in kcal mol<sup>-1</sup>) obtained at the B3LYP/6-311+G\*\* level for several fluoro-bicyclobutane derivatives. Compounds that may exhibit *cis-trans* isomerism were also calculated.  $\Delta E_T^\ddagger$  is the electronic,  $\Delta E_L^\ddagger$  the Lewis, and  $\Delta E_{NL}^\ddagger$  the non-Lewis energy contributions to the inversion barrier.

|            | Compound                   | $\Delta E_T^\ddagger$ (kcal mol <sup>-1</sup> ) | $\Delta E_L^\ddagger$ (kcal mol <sup>-1</sup> ) | $\Delta E_{NL}^\ddagger$ (kcal mol <sup>-1</sup> ) |
|------------|----------------------------|-------------------------------------------------|-------------------------------------------------|----------------------------------------------------|
| <b>F=0</b> | <b>BCB</b>                 | 73.9                                            | 56.5                                            | 17.4                                               |
| <b>F=1</b> | <b>1-FBCB</b>              | 54.1                                            | 88.8                                            | -34.7                                              |
|            | <b>2-FBCB</b>              | 51.7                                            | 57.5                                            | -5.8                                               |
| <b>F=2</b> | <b>1,2-FBCB</b>            | 38.8                                            | 77.4                                            | -38.6                                              |
|            | <b>1,3-FBCB</b>            | 36.5                                            | 90.3                                            | -53.8                                              |
|            | <b>2,2-FBCB</b>            | 46.9                                            | 43.9                                            | 3.0                                                |
|            | <i>cis</i> -2,4-FBCB       | 36.6                                            | 50.2                                            | -13.6                                              |
|            | <i>trans</i> -2,4-FBCB     | 40.9                                            | 44.5                                            | -3.6                                               |
|            |                            |                                                 |                                                 |                                                    |
| <b>F=3</b> | <b>1,2,2-FBCB</b>          | 30.8                                            | 68.0                                            | -37.2                                              |
|            | <b>1,2,3-FBCB</b>          | 25.0                                            | 83.7                                            | -58.7                                              |
|            | <i>cis</i> -1,2,4-FBCB     | 27.5                                            | 58.4                                            | -30.9                                              |
|            | <i>trans</i> -1,2,4-FBCB   | 25.3                                            | 65.5                                            | -40.2                                              |
|            | <b>2,2,4-FBCB</b>          | 32.7                                            | 44.0                                            | -11.3                                              |
| <b>F=4</b> | <b>1,2,2,3-FBCB</b>        | 16.9                                            | 74.4                                            | -57.5                                              |
|            | <b>1,2,2,4-FBCB</b>        | 17.3                                            | 61.5                                            | -44.2                                              |
|            | <i>cis</i> -1,2,3,4-FBCB   | 5.4                                             | 63.7                                            | -58.3                                              |
|            | <i>trans</i> -1,2,3,4-FBCB | 11.8                                            | 69.8                                            | -58.0                                              |
|            | <b>2,2,4,4-FBCB</b>        | 27.4                                            | 34.6                                            | -7.2                                               |
| <b>F=5</b> | <b>1,2,2,4,4-FBCB</b>      | 14.3                                            | 52.6                                            | -38.3                                              |
|            | <b>1,2,3,4,4-FBCB</b>      | 4.7                                             | 59.6                                            | -54.9                                              |
| <b>F=6</b> | <b>Perfluoro-BCB</b>       | 3.6                                             | 48.7                                            | -45.1                                              |

**Table S3.** Pairwise steric exchange energies  $\Delta E_{(i,j)}$  (kcal mol<sup>-1</sup>) and associated pre-NLMO overlaps  $S_{(i,j)}$  (au) for interactions between NLMOs (i, j) as obtained by Natural Steric analysis at the B3LYP/6-311+G\*\* level for **BCB(Min)**.

| NLMO (i)          | NLMO (j)         | $S_{(i,j)}$ | $\Delta E_{(i,j)}$ |
|-------------------|------------------|-------------|--------------------|
| $\sigma_{C1-C2}$  | $\sigma_{C3-C4}$ | 0.1246      | 4.19               |
| $\sigma_{C1-C2}$  | $\sigma_{C3-H7}$ | -0.0455     | 1.58               |
| $\sigma_{C1-C2}$  | $\sigma_{C4-H5}$ | 0.1049      | 1.59               |
| $\sigma_{C1-C2}$  | $\sigma_{C4-H6}$ | -0.1099     | 4.36               |
| $\sigma_{C1-C3}$  | $\sigma_{C2-H8}$ | -0.0777     | 3.58               |
| $\sigma_{C1-C3}$  | $\sigma_{C2-H9}$ | 0.0992      | 2.69               |
| $\sigma_{C1-C3}$  | $\sigma_{C4-H5}$ | -0.0777     | 3.58               |
| $\sigma_{C1-C3}$  | $\sigma_{C4-H6}$ | 0.0992      | 2.69               |
| $\sigma_{C1-C4}$  | $\sigma_{C2-C3}$ | 0.1246      | 4.19               |
| $\sigma_{C1-C4}$  | $\sigma_{C2-H8}$ | 0.1049      | 1.59               |
| $\sigma_{C1-C4}$  | $\sigma_{C2-H9}$ | -0.1099     | 4.36               |
| $\sigma_{C1-C4}$  | $\sigma_{C3-H7}$ | -0.0455     | 1.58               |
| $\sigma_{C1-H10}$ | $\sigma_{C2-C3}$ | -0.0455     | 1.58               |
| $\sigma_{C1-H10}$ | $\sigma_{C2-H8}$ | -0.0600     | 1.31               |
| $\sigma_{C1-H10}$ | $\sigma_{C2-H9}$ | 0.0684      | 1.03               |
| $\sigma_{C1-H10}$ | $\sigma_{C3-C4}$ | -0.0455     | 1.58               |
| $\sigma_{C1-H10}$ | $\sigma_{C4-H5}$ | -0.0600     | 1.31               |
| $\sigma_{C1-H10}$ | $\sigma_{C4-H6}$ | 0.0684      | 1.03               |
| $\sigma_{C2-C3}$  | $\sigma_{C4-H5}$ | 0.1049      | 1.59               |
| $\sigma_{C2-C3}$  | $\sigma_{C4-H6}$ | -0.1099     | 4.36               |
| $\sigma_{C2-H8}$  | $\sigma_{C3-C4}$ | 0.1049      | 1.59               |
| $\sigma_{C2-H8}$  | $\sigma_{C3-H7}$ | -0.0600     | 1.31               |
| $\sigma_{C2-H8}$  | $\sigma_{C4-H5}$ | 0.0897      | 0.92               |
| $\sigma_{C2-H9}$  | $\sigma_{C3-C4}$ | -0.1099     | 4.36               |
| $\sigma_{C2-H9}$  | $\sigma_{C3-H7}$ | 0.0684      | 1.03               |
| $\sigma_{C3-H7}$  | $\sigma_{C4-H5}$ | -0.0600     | 1.31               |
| $\sigma_{C3-H7}$  | $\sigma_{C4-H6}$ | 0.0684      | 1.03               |

**Table S4.** Pairwise steric exchange energies  $\Delta E_{(i,j)}$  (kcal mol<sup>-1</sup>) and associated pre-NLMO overlaps  $S_{(i,j)}$  (au) for interactions between NLMOs (i, j) as obtained by Natural Steric analysis at the B3LYP/6-311+G\*\* level for **BCB(TS)**.

| NLMO (i)         | NLMO (j)         | $S_{(i,j)}$ | $\Delta E_{(i,j)}$ |
|------------------|------------------|-------------|--------------------|
| $\sigma_{C1-C2}$ | $\sigma_{C3-C4}$ | 0.2884      | 24.08              |
| $\sigma_{C1-C2}$ | $\sigma_{C3-H7}$ | -0.0951     | 4.21               |
| $\sigma_{C1-C2}$ | $\sigma_{C4-H5}$ | -0.0453     | 0.93               |
| $\sigma_{C1-C2}$ | $\sigma_{C4-H6}$ | -0.0453     | 0.93               |
| $\sigma_{C1-C3}$ | $\sigma_{C2-H8}$ | 0.2396      | 17.19              |
| $\sigma_{C1-C3}$ | $\sigma_{C2-H9}$ | -0.2396     | 17.19              |
| $\sigma_{C1-C3}$ | $\sigma_{C4-H5}$ | 0.2396      | 17.19              |
| $\sigma_{C1-C3}$ | $\sigma_{C4-H6}$ | -0.2396     | 17.19              |
| $\sigma_{C1-C4}$ | $\sigma_{C2-C3}$ | 0.2884      | 24.08              |
| $\sigma_{C1-C4}$ | $\sigma_{C2-H8}$ | -0.0453     | 0.93               |
| $\sigma_{C1-C4}$ | $\sigma_{C2-H9}$ | -0.0453     | 0.93               |
| $\sigma_{C1-C4}$ | $\sigma_{C3-H7}$ | -0.0951     | 4.21               |
| $\sigma_{C1-H0}$ | $\sigma_{C2-C3}$ | -0.0951     | 4.21               |
| $\sigma_{C1-H0}$ | $\sigma_{C3-C4}$ | -0.0951     | 4.21               |
| $\sigma_{C2-C3}$ | $\sigma_{C4-H5}$ | -0.0453     | 0.93               |
| $\sigma_{C2-C3}$ | $\sigma_{C4-H6}$ | -0.0453     | 0.93               |
| $\sigma_{C2-H8}$ | $\sigma_{C3-C4}$ | -0.0453     | 0.93               |
| $\sigma_{C2-H9}$ | $\sigma_{C3-C4}$ | -0.0453     | 0.93               |

**Table S5.** Pairwise steric exchange energies  $\Delta E_{(i,j)}$  (kcal mol<sup>-1</sup>) and associated pre-NLMO overlaps  $S_{(i,j)}$  (au) for interactions between NLMOs (i, j) as obtained by Natural Steric analysis at the B3LYP/6-311+G\*\* level for **1-FBCB(Min)**.

| NLMO (i)          | NLMO (j)         | $S_{(i,j)}$ | $\Delta E_{(i,j)}$ |
|-------------------|------------------|-------------|--------------------|
| $n_{F10}$         | $\sigma_{C2-C3}$ | -0.0497     | -0.78              |
| $n_{F10}$         | $\sigma_{C3-C4}$ | -0.0497     | -0.78              |
| $n_{F10}$         | $\sigma_{C1-C2}$ | -0.1284     | 6.86               |
| $n_{F10}$         | $\sigma_{C1-C4}$ | 0.1283      | 6.84               |
| $n_{F10}$         | $\sigma_{C1-C2}$ | -0.0531     | 1.68               |
| $n_{F10}$         | $\sigma_{C1-C3}$ | 0.1631      | 12.00              |
| $n_{F10}$         | $\sigma_{C1-C4}$ | -0.0532     | 1.68               |
| $\sigma_{C1-C2}$  | $\sigma_{C3-C4}$ | 0.1168      | 3.42               |
| $\sigma_{C1-C2}$  | $\sigma_{C3-H6}$ | -0.0365     | 1.23               |
| $\sigma_{C1-C2}$  | $\sigma_{C4-H5}$ | -0.1020     | 3.81               |
| $\sigma_{C1-C2}$  | $\sigma_{C4-H8}$ | 0.0961      | 1.35               |
| $\sigma_{C1-C3}$  | $\sigma_{C2-H7}$ | -0.0850     | 4.11               |
| $\sigma_{C1-C3}$  | $\sigma_{C2-H9}$ | 0.1104      | 3.63               |
| $\sigma_{C1-C3}$  | $\sigma_{C4-H5}$ | 0.1105      | 3.63               |
| $\sigma_{C1-C3}$  | $\sigma_{C4-H8}$ | -0.0850     | 4.11               |
| $\sigma_{C1-C4}$  | $\sigma_{C2-C3}$ | 0.1170      | 3.45               |
| $\sigma_{C1-C4}$  | $\sigma_{C2-H7}$ | 0.0962      | 1.36               |
| $\sigma_{C1-C4}$  | $\sigma_{C2-H9}$ | -0.1019     | 3.80               |
| $\sigma_{C1-C4}$  | $\sigma_{C3-H6}$ | -0.0366     | 1.23               |
| $\sigma_{C1-F10}$ | $\sigma_{C2-C3}$ | -0.0737     | 1.66               |
| $\sigma_{C1-F10}$ | $\sigma_{C2-H7}$ | -0.0665     | 1.03               |
| $\sigma_{C1-F10}$ | $\sigma_{C3-C4}$ | -0.0737     | 1.66               |
| $\sigma_{C1-F10}$ | $\sigma_{C4-H8}$ | -0.0665     | 1.03               |
| $\sigma_{C2-C3}$  | $\sigma_{C4-H5}$ | -0.1154     | 4.58               |
| $\sigma_{C2-C3}$  | $\sigma_{C4-H8}$ | 0.0950      | 1.47               |
| $\sigma_{C2-H7}$  | $\sigma_{C3-C4}$ | 0.0950      | 1.47               |
| $\sigma_{C2-H7}$  | $\sigma_{C3-H6}$ | -0.0594     | 1.15               |
| $\sigma_{C2-H7}$  | $\sigma_{C4-H8}$ | 0.0716      | 0.55               |
| $\sigma_{C2-H9}$  | $\sigma_{C3-C4}$ | -0.1154     | 4.58               |
| $\sigma_{C2-H9}$  | $\sigma_{C3-H6}$ | 0.0731      | 1.16               |
| $\sigma_{C3-H6}$  | $\sigma_{C4-H5}$ | 0.0731      | 1.16               |
| $\sigma_{C3-H6}$  | $\sigma_{C4-H8}$ | -0.0594     | 1.16               |

**Table S6.** Pairwise steric exchange energies  $\Delta E_{(i,j)}$  (kcal mol<sup>-1</sup>) and associated pre-NLMO overlaps  $S_{(i,j)}$  (au) for interactions between NLMOs (i, j) as obtained by Natural Steric analysis at the B3LYP/6-311+G\*\* level for **1-FBCB(TS)**.

| NLMO (i)         | NLMO (j)         | $S_{(i,j)}$ | $\Delta E_{(i,j)}$ |
|------------------|------------------|-------------|--------------------|
| $n_{F10}$        | $\sigma_{C2-C3}$ | -0.0673     | -1.18              |
| $n_{F10}$        | $\sigma_{C3-C4}$ | -0.0673     | -1.18              |
| $n_{F10}$        | $\sigma_{C1-C2}$ | 0.1431      | 8.44               |
| $n_{F10}$        | $\sigma_{C1-C4}$ | -0.1431     | 8.44               |
| $n_{F10}$        | $\sigma_{C1-C3}$ | 0.1492      | 12.03              |
| $\sigma_{C1-C2}$ | $\sigma_{C3-C4}$ | 0.2570      | 21.23              |
| $\sigma_{C1-C2}$ | $\sigma_{C3-H6}$ | -0.0809     | 3.62               |
| $\sigma_{C1-C2}$ | $\sigma_{C4-H5}$ | -0.0508     | 0.98               |
| $\sigma_{C1-C2}$ | $\sigma_{C4-H8}$ | -0.0508     | 0.98               |
| $\sigma_{C1-C3}$ | $\sigma_{C2-H7}$ | 0.2359      | 17.27              |
| $\sigma_{C1-C3}$ | $\sigma_{C2-H9}$ | -0.2358     | 17.26              |
| $\sigma_{C1-C3}$ | $\sigma_{C4-H5}$ | -0.2358     | 17.26              |
| $\sigma_{C1-C3}$ | $\sigma_{C4-H8}$ | 0.2359      | 17.27              |
| $\sigma_{C1-C4}$ | $\sigma_{C2-C3}$ | 0.2570      | 21.22              |
| $\sigma_{C1-C4}$ | $\sigma_{C2-H7}$ | -0.0508     | 0.98               |
| $\sigma_{C1-C4}$ | $\sigma_{C2-H9}$ | -0.0508     | 0.98               |
| $\sigma_{C1-C4}$ | $\sigma_{C3-H6}$ | -0.0809     | 3.62               |
| $\sigma_{C1-F0}$ | $\sigma_{C2-C3}$ | -0.1215     | 3.50               |
| $\sigma_{C1-F0}$ | $\sigma_{C3-C4}$ | -0.1215     | 3.50               |
| $\sigma_{C2-C3}$ | $\sigma_{C4-H5}$ | -0.0443     | 0.88               |
| $\sigma_{C2-C3}$ | $\sigma_{C4-H8}$ | -0.0443     | 0.88               |
| $\sigma_{C2-H7}$ | $\sigma_{C3-C4}$ | -0.0443     | 0.88               |
| $\sigma_{C2-H9}$ | $\sigma_{C3-C4}$ | -0.0443     | 0.88               |

**Table S7.** Pairwise steric exchange energies  $\Delta E_{(i,j)}$  (kcal mol<sup>-1</sup>) and associated pre-NLMO overlaps  $S_{(i,j)}$  (au) for interactions between NLMOs (i, j) as obtained by Natural Steric analysis at the B3LYP/6-311+G\*\* level for **2-FBCB(Min)**.

| NLMO (i)         | NLMO (j)         | $S_{(i,j)}$ | $\Delta E_{(i,j)}$ |
|------------------|------------------|-------------|--------------------|
| $n_{F10}$        | $\sigma_{C1-C2}$ | -0.0898     | 2.16               |
| $n_{F10}$        | $\sigma_{C1-C3}$ | -0.0815     | 0.78               |
| $n_{F10}$        | $\sigma_{C2-C3}$ | -0.0898     | 2.16               |
| $n_{F10}$        | $\sigma_{C2-H7}$ | 0.1201      | 7.46               |
| $n_{F10}$        | $\sigma_{C1-C2}$ | -0.1286     | 7.36               |
| $n_{F10}$        | $\sigma_{C2-C3}$ | 0.1287      | 7.36               |
| $\sigma_{C1-C2}$ | $\sigma_{C3-C4}$ | 0.1345      | 4.76               |
| $\sigma_{C1-C2}$ | $\sigma_{C3-H6}$ | -0.0391     | 1.30               |
| $\sigma_{C1-C2}$ | $\sigma_{C4-H5}$ | -0.1114     | 4.45               |
| $\sigma_{C1-C2}$ | $\sigma_{C4-H8}$ | 0.1011      | 1.47               |
| $\sigma_{C1-C3}$ | $\sigma_{C2-H7}$ | -0.0792     | 3.89               |
| $\sigma_{C1-C3}$ | $\sigma_{C2-F1}$ | 0.1014      | 3.09               |
| $\sigma_{C1-C3}$ | $\sigma_{C4-H5}$ | 0.1025      | 3.21               |
| $\sigma_{C1-C3}$ | $\sigma_{C4-H8}$ | -0.0875     | 4.21               |
| $\sigma_{C1-C4}$ | $\sigma_{C2-C3}$ | 0.1345      | 4.76               |
| $\sigma_{C1-C4}$ | $\sigma_{C2-H7}$ | 0.0779      | 0.70               |
| $\sigma_{C1-C4}$ | $\sigma_{C2-F1}$ | -0.1022     | 2.94               |
| $\sigma_{C1-C4}$ | $\sigma_{C3-H6}$ | -0.0501     | 1.80               |
| $\sigma_{C1-H9}$ | $\sigma_{C2-C3}$ | -0.0391     | 1.30               |
| $\sigma_{C1-H9}$ | $\sigma_{C2-H7}$ | -0.0465     | 0.82               |
| $\sigma_{C1-H9}$ | $\sigma_{C3-C4}$ | -0.0501     | 1.80               |
| $\sigma_{C1-H9}$ | $\sigma_{C4-H5}$ | 0.0633      | 0.99               |
| $\sigma_{C1-H9}$ | $\sigma_{C4-H8}$ | -0.0588     | 1.24               |
| $\sigma_{C2-C3}$ | $\sigma_{C4-H5}$ | -0.1114     | 4.45               |
| $\sigma_{C2-C3}$ | $\sigma_{C4-H8}$ | 0.1011      | 1.47               |
| $\sigma_{C2-H7}$ | $\sigma_{C3-C4}$ | 0.0779      | 0.70               |
| $\sigma_{C2-H7}$ | $\sigma_{C3-H6}$ | -0.0465     | 0.82               |
| $\sigma_{C2-H7}$ | $\sigma_{C4-H8}$ | 0.0702      | 0.58               |
| $\sigma_{C2-F0}$ | $\sigma_{C3-C4}$ | -0.1022     | 2.94               |
| $\sigma_{C3-H6}$ | $\sigma_{C4-H5}$ | 0.0633      | 0.99               |
| $\sigma_{C3-H6}$ | $\sigma_{C4-H8}$ | -0.0588     | 1.24               |

**Table S8.** Pairwise steric exchange energies  $\Delta E_{(i,j)}$  (kcal mol<sup>-1</sup>) and associated pre-NLMO overlaps  $S_{(i,j)}$  (au) for interactions between NLMOs (i, j) as obtained by Natural Steric analysis at the B3LYP/6-311+G\*\* level for **2-FBCB(TS)**.

| NLMO (i)         | NLMO (j)          | $S_{(i,j)}$ | $\Delta E_{(i,j)}$ |
|------------------|-------------------|-------------|--------------------|
| $n_{F10}$        | $\sigma_{C1-C2}$  | -0.0760     | 1.29               |
| $n_{F10}$        | $\sigma_{C1-C3}$  | 0.0621      | 1.74               |
| $n_{F10}$        | $\sigma_{C2-C3}$  | -0.0760     | 1.29               |
| $n_{F10}$        | $\sigma_{C2-H7}$  | 0.1190      | 5.77               |
| $n_{F10}$        | $\sigma_{C1-C2}$  | 0.1132      | 4.32               |
| $n_{F10}$        | $\sigma_{C2-C3}$  | -0.1132     | 4.32               |
| $\sigma_{C1-C2}$ | $\sigma_{C3-C4}$  | 0.2927      | 24.69              |
| $\sigma_{C1-C2}$ | $\sigma_{C3-H6}$  | -0.0956     | 4.35               |
| $\sigma_{C1-C2}$ | $\sigma_{C4-H5}$  | -0.0427     | 0.93               |
| $\sigma_{C1-C2}$ | $\sigma_{C4-H8}$  | -0.0371     | 0.68               |
| $\sigma_{C1-C3}$ | $\sigma_{C2-H7}$  | 0.1539      | 7.20               |
| $\sigma_{C1-C3}$ | $\sigma_{C2-F10}$ | -0.2734     | 20.46              |
| $\sigma_{C1-C3}$ | $\sigma_{C4-H5}$  | -0.1989     | 13.34              |
| $\sigma_{C1-C3}$ | $\sigma_{C4-H8}$  | 0.2340      | 15.71              |
| $\sigma_{C1-C4}$ | $\sigma_{C2-C3}$  | 0.2927      | 24.69              |
| $\sigma_{C1-C4}$ | $\sigma_{C2-H7}$  | -0.0806     | 2.57               |
| $\sigma_{C1-C4}$ | $\sigma_{C3-H6}$  | -0.0921     | 3.97               |
| $\sigma_{C1-H9}$ | $\sigma_{C2-C3}$  | -0.0956     | 4.35               |
| $\sigma_{C1-H9}$ | $\sigma_{C3-C4}$  | -0.0921     | 3.97               |
| $\sigma_{C2-C3}$ | $\sigma_{C4-H5}$  | -0.0427     | 0.93               |
| $\sigma_{C2-C3}$ | $\sigma_{C4-H8}$  | -0.0371     | 0.68               |
| $\sigma_{C2-H7}$ | $\sigma_{C3-C4}$  | -0.0806     | 2.57               |

**Table S9.** Experimental conversion rates (Baran *et al*<sup>7</sup>) and calculated LUMO (au),  $\Delta H^\ddagger(\text{TS}_N)$  (kcal mol<sup>-1</sup>) and  $\Delta G^\ddagger(\text{TS}_N)$  (kcal mol<sup>-1</sup>) for the for the reaction of dibenzylamine with sulfonylated BCBs.

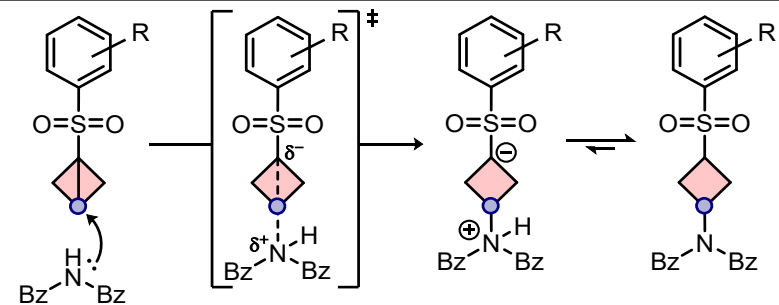

| R                 | Conversion (24h) | LUMO     | $\Delta H^\ddagger(\text{TS}_N)$ | $\Delta G^\ddagger(\text{TS}_N)$ |
|-------------------|------------------|----------|----------------------------------|----------------------------------|
| 4-OMe             | 16%              | -0.04601 | 14.9                             | 27.9                             |
| 4-Me              | 10%              | -0.05423 | 15.2                             | 27.9                             |
| 4-F               | 40%              | -0.06053 | 13.7                             | 26.1                             |
| 4-Cl              | 59%              | -0.06800 | 13.4                             | 25.5                             |
| 4-CF <sub>3</sub> | 79%              | -0.07850 | 12.6                             | 24.8                             |
| 3,5-diF           | 87%              | -0.07090 | 12.0                             | 24.3                             |

## Optimised Cartesian Coordinates

| Ring Inversion Barriers (B3LYP/6-311+G**)                              |           |           |           |                                                                         |           |           |
|------------------------------------------------------------------------|-----------|-----------|-----------|-------------------------------------------------------------------------|-----------|-----------|
| <b>BCB(Min)</b>                                                        |           |           |           | <b>BCB(TS)</b>                                                          |           |           |
| Electronic Energy = -155.991199645 au                                  |           |           |           | Electronic Energy = -155.873328674 au                                   |           |           |
| Enthalpy = -155.900644 au                                              |           |           |           | Enthalpy = -155.786216 au                                               |           |           |
| Gibbs Free Energy = -155.930772 au                                     |           |           |           | Gibbs Free Energy = -155.816431 au                                      |           |           |
| Lowest Harmonic Vibrational Frequency (LHVF) = 425.22 cm <sup>-1</sup> |           |           |           | Lowest Harmonic Vibrational Frequency (LHVF) = 694.03i cm <sup>-1</sup> |           |           |
| C                                                                      | -0.000002 | 0.746299  | -0.317785 | C                                                                       | 0.000000  | 0.955553  |
| C                                                                      | 1.137408  | 0.000056  | 0.313321  | C                                                                       | 1.172525  | -0.000000 |
| C                                                                      | -0.000002 | -0.746420 | -0.317519 | C                                                                       | -0.000000 | -0.955552 |
| C                                                                      | -1.137405 | 0.000056  | 0.313333  | C                                                                       | -1.172525 | -0.000000 |
| H                                                                      | -2.083256 | -0.000041 | -0.221489 | H                                                                       | -1.835860 | -0.000000 |
| H                                                                      | -1.236908 | 0.000285  | 1.400136  | H                                                                       | -1.835861 | 0.000000  |
| H                                                                      | -0.000006 | -1.428825 | -1.152419 | H                                                                       | -0.000000 | -2.047449 |
| H                                                                      | 2.083253  | -0.000041 | -0.221512 | H                                                                       | 1.835861  | -0.000001 |
| H                                                                      | 1.236924  | 0.000285  | 1.400123  | H                                                                       | 1.835861  | -0.000000 |
| H                                                                      | -0.000006 | 1.428396  | -1.152938 | H                                                                       | -0.000001 | 2.047450  |
| <b>1-FBCB(Min)</b>                                                     |           |           |           | <b>1-FBCB(TS)</b>                                                       |           |           |
| Electronic Energy = -255.250011409 au                                  |           |           |           | Electronic Energy = -255.163887944 au                                   |           |           |
| Enthalpy = -255.166585 au                                              |           |           |           | Enthalpy = -255.083166 au                                               |           |           |
| Gibbs Free Energy = -255.199086 au                                     |           |           |           | Gibbs Free Energy = -255.115925 au                                      |           |           |
| Lowest Harmonic Vibrational Frequency (LHVF) = 320.45 cm <sup>-1</sup> |           |           |           | Lowest Harmonic Vibrational Frequency (LHVF) = 385.11i cm <sup>-1</sup> |           |           |
| C                                                                      | -0.865204 | 0.000008  | 0.683710  | C                                                                       | 1.408330  | -0.000081 |
| C                                                                      | -0.616470 | -1.154963 | -0.272260 | C                                                                       | 0.462478  | 1.192461  |
| C                                                                      | 0.306248  | -0.000003 | -0.197672 | C                                                                       | -0.412680 | 0.000019  |
| C                                                                      | -0.616447 | 1.154969  | -0.272263 | C                                                                       | 0.462269  | -1.192503 |
| H                                                                      | -0.261190 | 2.072702  | 0.188701  | H                                                                       | 0.428010  | -1.844401 |
| H                                                                      | -0.261235 | -2.072706 | 0.188697  | H                                                                       | 0.428297  | 1.844339  |
| H                                                                      | -1.257394 | -1.302599 | -1.143126 | H                                                                       | 0.428309  | 1.844878  |
| H                                                                      | -0.970471 | 0.000018  | 1.755857  | H                                                                       | 2.494342  | -0.000189 |
| F                                                                      | 1.639878  | -0.000011 | 0.055990  | F                                                                       | -1.747728 | 0.000063  |
| H                                                                      | -1.257368 | 1.302626  | -1.143132 | H                                                                       | 0.428218  | -1.844566 |
| <b>2-FBCB(Min)</b>                                                     |           |           |           | <b>2-FBCB(TS)</b>                                                       |           |           |
| Electronic Energy = -255.263599043 au                                  |           |           |           | Electronic Energy = -255.176164985 au                                   |           |           |
| Enthalpy = -255.179699 au                                              |           |           |           | Enthalpy = -255.095295 au                                               |           |           |
| Gibbs Free Energy = -255.211975 au                                     |           |           |           | Gibbs Free Energy = -255.127948 au                                      |           |           |
| Lowest Harmonic Vibrational Frequency (LHVF) = 264.57 cm <sup>-1</sup> |           |           |           | Lowest Harmonic Vibrational Frequency (LHVF) = 518.30i cm <sup>-1</sup> |           |           |
| C                                                                      | 0.593366  | -0.389673 | -0.764474 | C                                                                       | -0.462735 | 0.965142  |
| C                                                                      | 1.213375  | 0.744616  | 0.000221  | C                                                                       | -1.546485 | 0.000001  |
| C                                                                      | 0.594129  | -0.389725 | 0.764039  | C                                                                       | -0.462738 | -0.965143 |
| C                                                                      | -0.654575 | -0.529411 | 0.000253  | C                                                                       | 0.551395  | 0.000001  |
| H                                                                      | -1.173568 | -1.481838 | 0.001234  | H                                                                       | 1.126059  | 0.000000  |
| H                                                                      | 1.055132  | -1.079134 | 1.455307  | H                                                                       | -0.390663 | -2.047846 |
| H                                                                      | 2.298972  | 0.792562  | -0.000061 | H                                                                       | -2.482545 | 0.000003  |
| H                                                                      | 0.722522  | 1.712563  | 0.000295  | H                                                                       | -1.805189 | 0.000002  |
| H                                                                      | 1.054026  | -1.077747 | -1.457386 | H                                                                       | -0.390657 | 2.047844  |
| F                                                                      | -1.603873 | 0.502084  | 0.000042  | F                                                                       | 1.718485  | -0.000001 |
| <b>1,2-FBCB(Min)</b>                                                   |           |           |           | <b>1,2-FBCB(TS)</b>                                                     |           |           |
| Electronic Energy = -354.522383983 au                                  |           |           |           | Electronic Energy = -354.460627666 au                                   |           |           |
| Enthalpy = -354.445709 au                                              |           |           |           | Enthalpy = -354.386135 au                                               |           |           |
| Gibbs Free Energy = -354.480364 au                                     |           |           |           | Gibbs Free Energy = -354.420584 au                                      |           |           |
| Lowest Harmonic Vibrational Frequency (LHVF) = 235.15 cm <sup>-1</sup> |           |           |           | Lowest Harmonic Vibrational Frequency (LHVF) = 261.18i cm <sup>-1</sup> |           |           |
| C                                                                      | 0.034911  | 0.743947  | 0.868628  | C                                                                       | 0.300808  | 1.363278  |
| C                                                                      | -0.501056 | 1.279216  | -0.450091 | C                                                                       | -1.132544 | 1.064355  |
| C                                                                      | -0.563979 | -0.172576 | -0.168220 | C                                                                       | -0.602032 | -0.261314 |

|                                                                                                                                                                                                                                                                                                                                                                                                                                                                                                                                                     |                                                                                                                                                                                                                                                                                                                                                                                                                                                                                                                                                   |
|-----------------------------------------------------------------------------------------------------------------------------------------------------------------------------------------------------------------------------------------------------------------------------------------------------------------------------------------------------------------------------------------------------------------------------------------------------------------------------------------------------------------------------------------------------|---------------------------------------------------------------------------------------------------------------------------------------------------------------------------------------------------------------------------------------------------------------------------------------------------------------------------------------------------------------------------------------------------------------------------------------------------------------------------------------------------------------------------------------------------|
| C 0.760467 -0.447794 0.377474<br>H 0.874177 -1.289854 1.052249<br>H -1.448382 1.808048 -0.384527<br>H 0.183468 1.665246 -1.199812<br>H -0.252932 1.005802 1.874975<br>F -1.659333 -0.965434 -0.160397<br>F 1.910623 -0.324121 -0.407339                                                                                                                                                                                                                                                                                                             | C 0.762703 0.034660 0.528742<br>H 1.235994 -0.245139 1.470890<br>H -1.945956 1.490691 0.318896<br>H -1.382698 1.173106 -1.348566<br>H 0.881227 2.272049 0.038291<br>F -1.177215 -1.437007 0.015068<br>F 1.759195 -0.551502 -0.442385                                                                                                                                                                                                                                                                                                              |
| <b>1,3-FBCB(Min)</b><br>Electronic Energy = -354.502390266 au<br>Enthalpy = -354.425783 au<br>Gibbs Free Energy = -354.460775 au<br>Lowest Harmonic Vibrational Frequency (LHVF) = 137.38 cm-1<br>C 0.727749 0.000001 0.133134<br>C -0.000004 -1.165857 0.735335<br>C -0.727767 0.000001 0.133145<br>C -0.000004 1.165868 0.735320<br>H -0.000022 2.061066 0.116808<br>H -0.000022 -2.061070 0.116852<br>H 0.000031 -1.354313 1.810726<br>F -1.708259 -0.000006 -0.793153<br>F 1.708274 -0.000006 -0.793147<br>H 0.000032 1.354355 1.810712         | <b>1,3-FBCB(TS)</b><br>Electronic Energy = -354.444182815 au<br>Enthalpy = -354.369719 au<br>Gibbs Free Energy = -354.403631 au<br>Lowest Harmonic Vibrational Frequency (LHVF) = 175.02i cm-1<br>C 0.897300 -0.000002 0.199190<br>C 0.000000 1.181144 -0.013728<br>C -0.897300 -0.000001 0.199191<br>C -0.000000 -1.181150 -0.013715<br>H -0.000001 -1.968482 0.746128<br>H 0.000001 1.968459 0.746132<br>H -0.000001 1.646411 -1.026336<br>F -2.201601 0.000006 -0.092509<br>F 2.201601 0.000006 -0.092509<br>H -0.000000 -1.646432 -1.026389   |
| <b>2,2-FBCB(Min)</b><br>Electronic Energy = -354.534295152 au<br>Enthalpy = -354.457944 au<br>Gibbs Free Energy = -354.492098 au<br>Lowest Harmonic Vibrational Frequency (LHVF) = 245.30 cm-1<br>C 0.698679 -0.425707 0.776190<br>C 1.759256 0.295690 -0.000010<br>C 0.698654 -0.425591 -0.776268<br>C -0.463852 0.008053 0.000021<br>H 1.780371 1.381684 0.000051<br>H 2.740171 -0.170257 -0.000061<br>H 0.780093 -1.255621 1.461172<br>H 0.780010 -1.255430 -1.461383<br>F -0.912052 1.302718 0.000135<br>F -1.558734 -0.793278 -0.000066        | <b>2,2-FBCB(TS)</b><br>Electronic Energy = -354.459495726 au<br>Enthalpy = -354.385856 au<br>Gibbs Free Energy = -354.420058 au<br>Lowest Harmonic Vibrational Frequency (LHVF) = 494.19i cm-1<br>C -0.679026 0.000918 0.975292<br>C -1.850772 -0.000173 0.000004<br>C -0.679036 0.001017 -0.975296<br>C 0.385967 0.000182 0.000003<br>H -2.494030 -0.890455 -0.000037<br>H -2.495702 0.888865 0.000052<br>H -0.637597 -0.000155 2.062390<br>H -0.637614 0.000093 -2.062394<br>F 1.288194 -1.087565 -0.000053<br>F 1.289822 1.086452 0.000050     |
| <b>cis-2,4-FBCB(Min)</b><br>Electronic Energy = -354.530224670 au<br>Enthalpy = -354.453272 au<br>Gibbs Free Energy = -354.487615 au<br>Lowest Harmonic Vibrational Frequency (LHVF) = 177.45 cm-1<br>C -0.000000 -0.846433 0.782293<br>C -1.128561 -0.306098 0.000049<br>C -0.000000 -0.846508 -0.782306<br>C 1.128572 -0.306059 0.000049<br>H -2.061907 -0.861705 0.000035<br>H 0.000009 -1.668412 1.485051<br>H 0.000008 -1.668291 -1.485275<br>F 1.419130 1.049477 -0.000020<br>F -1.419139 1.049489 -0.000020<br>H 2.061902 -0.861699 0.000035 | <b>cis-2,4-FBCB(TS)</b><br>Electronic Energy = -354.464809647 au<br>Enthalpy = -354.390551 au<br>Gibbs Free Energy = -354.425068 au<br>Lowest Harmonic Vibrational Frequency (LHVF) = 420.20i cm-1<br>C -0.000003 0.489145 0.970150<br>C 1.112091 0.454121 -0.000033<br>C -0.000003 0.489005 -0.970218<br>C -1.112088 0.454093 -0.000033<br>H 1.914731 1.192692 -0.000086<br>H -0.000007 0.381766 2.052879<br>H -0.000006 0.381466 -2.052932<br>F -1.841294 -0.803713 0.000057<br>F 1.841298 -0.803715 0.000058<br>H -1.914745 1.192737 -0.000083 |
| <b>trans-2,4-FBCB(Min)</b><br>Electronic Energy = -354.530596512 au<br>Enthalpy = -354.453922 au<br>Gibbs Free Energy = -354.488426 au<br>Lowest Harmonic Vibrational Frequency (LHVF) =                                                                                                                                                                                                                                                                                                                                                            | <b>trans-2,4-FBCB(TS)</b><br>Electronic Energy = -354.465455469 au<br>Enthalpy = -354.391228 au<br>Gibbs Free Energy = -354.425779 au<br>Lowest Harmonic Vibrational Frequency (LHVF) =                                                                                                                                                                                                                                                                                                                                                           |

|                                                                                                                                                                                                      |           |           |           |                                                                                                                                                                                                      |           |           |           |
|------------------------------------------------------------------------------------------------------------------------------------------------------------------------------------------------------|-----------|-----------|-----------|------------------------------------------------------------------------------------------------------------------------------------------------------------------------------------------------------|-----------|-----------|-----------|
| 180.13 cm-1                                                                                                                                                                                          |           |           |           | 423.33i cm-1                                                                                                                                                                                         |           |           |           |
| C                                                                                                                                                                                                    | 0.042796  | 0.519593  | 0.776990  | C                                                                                                                                                                                                    | -0.000004 | 0.971583  | 0.000040  |
| C                                                                                                                                                                                                    | -1.198495 | 0.461247  | 0.000095  | C                                                                                                                                                                                                    | 0.979401  | -0.000000 | 0.518075  |
| C                                                                                                                                                                                                    | 0.042794  | 0.519959  | -0.776911 | C                                                                                                                                                                                                    | -0.000005 | -0.971580 | 0.000040  |
| C                                                                                                                                                                                                    | 0.840443  | -0.467307 | -0.000062 | C                                                                                                                                                                                                    | -0.979366 | -0.000000 | -0.518067 |
| H                                                                                                                                                                                                    | 0.397046  | 1.245289  | 1.493662  | H                                                                                                                                                                                                    | 0.000010  | 2.059114  | -0.000022 |
| H                                                                                                                                                                                                    | 0.396615  | 1.245205  | -1.494295 | H                                                                                                                                                                                                    | 0.000008  | -2.059111 | -0.000021 |
| F                                                                                                                                                                                                    | 2.202962  | -0.236120 | 0.000064  | F                                                                                                                                                                                                    | -2.216194 | -0.000001 | 0.257124  |
| H                                                                                                                                                                                                    | 0.647026  | -1.534446 | -0.000738 | H                                                                                                                                                                                                    | -1.349407 | -0.000000 | -1.544845 |
| H                                                                                                                                                                                                    | -1.857996 | 1.321468  | 0.000384  | H                                                                                                                                                                                                    | 1.349487  | -0.000000 | 1.544836  |
| F                                                                                                                                                                                                    | -1.974954 | -0.705931 | -0.000028 | F                                                                                                                                                                                                    | 2.216166  | -0.000001 | -0.257177 |
| <b>1,2,2-FBCB(Min)</b><br>Electronic Energy = -453.789331106 au<br>Enthalpy = -453.720134 au<br>Gibbs Free Energy = -453.756669 au<br>Lowest Harmonic Vibrational Frequency (LHVF) = 200.28 cm-1     |           |           |           | <b>1,2,2-FBCB(TS)</b><br>Electronic Energy = -453.740279176 au<br>Enthalpy = -453.672947 au<br>Gibbs Free Energy = -453.709028 au<br>Lowest Harmonic Vibrational Frequency (LHVF) = 240.65i cm-1     |           |           |           |
| C                                                                                                                                                                                                    | 0.288185  | -0.598771 | 0.998027  | C                                                                                                                                                                                                    | -0.043415 | 1.416521  | 0.002377  |
| C                                                                                                                                                                                                    | -0.680220 | -0.039205 | 0.045050  | C                                                                                                                                                                                                    | 0.599357  | 0.126722  | 0.000455  |
| C                                                                                                                                                                                                    | 0.735611  | 0.145272  | -0.265361 | C                                                                                                                                                                                                    | -0.774739 | -0.320532 | 0.001758  |
| C                                                                                                                                                                                                    | 1.274136  | -1.202274 | 0.014667  | C                                                                                                                                                                                                    | -1.512107 | 0.981158  | -0.000260 |
| H                                                                                                                                                                                                    | 0.398557  | -0.396390 | 2.051859  | H                                                                                                                                                                                                    | 0.396019  | 2.407885  | -0.000304 |
| H                                                                                                                                                                                                    | 0.993966  | -2.054802 | -0.598608 | H                                                                                                                                                                                                    | -2.106096 | 1.206102  | -0.896385 |
| F                                                                                                                                                                                                    | -1.525179 | -0.807387 | -0.708538 | F                                                                                                                                                                                                    | 1.419186  | -0.233546 | -1.086085 |
| F                                                                                                                                                                                                    | -1.372524 | 1.054103  | 0.439310  | F                                                                                                                                                                                                    | 1.422048  | -0.235576 | 1.083807  |
| F                                                                                                                                                                                                    | 1.408656  | 1.290706  | -0.461064 | F                                                                                                                                                                                                    | -1.262894 | -1.535791 | -0.000224 |
| H                                                                                                                                                                                                    | 2.302624  | -1.215738 | 0.365079  | H                                                                                                                                                                                                    | -2.109562 | 1.207006  | 0.893230  |
| <b>1,2,3-FBCB(Min)</b><br>Electronic Energy = -453.774869568 au<br>Enthalpy = -453.705116 au<br>Gibbs Free Energy = -453.742253 au<br>Lowest Harmonic Vibrational Frequency (LHVF) = 145.71 cm-1     |           |           |           | <b>1,2,3-FBCB(TS)</b><br>Electronic Energy = -453.735096079 au<br>Enthalpy = -453.667061 au<br>Gibbs Free Energy = -453.703439 au<br>Lowest Harmonic Vibrational Frequency (LHVF) = 117.15i cm-1     |           |           |           |
| C                                                                                                                                                                                                    | 0.257490  | 0.752736  | -0.063358 | C                                                                                                                                                                                                    | 0.903694  | -0.357204 | 0.181535  |
| C                                                                                                                                                                                                    | -0.875307 | -0.000053 | 0.486113  | C                                                                                                                                                                                                    | 0.000001  | 0.715669  | 0.549015  |
| C                                                                                                                                                                                                    | 0.257514  | -0.752768 | -0.063394 | C                                                                                                                                                                                                    | -0.903695 | -0.357199 | 0.181530  |
| C                                                                                                                                                                                                    | 0.565253  | 0.000021  | -1.323733 | C                                                                                                                                                                                                    | -0.000002 | -1.487305 | -0.223675 |
| H                                                                                                                                                                                                    | 1.618692  | 0.000072  | -1.597748 | H                                                                                                                                                                                                    | -0.000008 | -2.387220 | 0.403269  |
| F                                                                                                                                                                                                    | -2.135658 | -0.000082 | -0.120073 | F                                                                                                                                                                                                    | 0.000005  | 1.852722  | -0.422096 |
| F                                                                                                                                                                                                    | 0.971901  | -1.739695 | 0.503519  | F                                                                                                                                                                                                    | -2.198380 | -0.269773 | -0.052338 |
| H                                                                                                                                                                                                    | -0.124100 | 0.000029  | -2.164684 | H                                                                                                                                                                                                    | 0.000001  | -1.776211 | -1.287324 |
| H                                                                                                                                                                                                    | -0.995894 | -0.000051 | 1.566106  | H                                                                                                                                                                                                    | -0.000001 | 1.261120  | 1.494568  |
| F                                                                                                                                                                                                    | 0.971712  | 1.739815  | 0.503504  | F                                                                                                                                                                                                    | 2.198378  | -0.269778 | -0.052338 |
| <b>cis-1,2,4-FBCB(Min)</b><br>Electronic Energy = -453.775392318 au<br>Enthalpy = -453.706060 au<br>Gibbs Free Energy = -453.743004 au<br>Lowest Harmonic Vibrational Frequency (LHVF) = 159.14 cm-1 |           |           |           | <b>cis-1,2,4-FBCB(TS)</b><br>Electronic Energy = -453.745089866 au<br>Enthalpy = -453.677207 au<br>Gibbs Free Energy = -453.713456 au<br>Lowest Harmonic Vibrational Frequency (LHVF) = 178.60i cm-1 |           |           |           |
| C                                                                                                                                                                                                    | -0.000012 | -0.932452 | -0.458455 | C                                                                                                                                                                                                    | 0.000000  | -1.227292 | -0.565124 |
| C                                                                                                                                                                                                    | 1.139384  | -0.528072 | 0.420184  | C                                                                                                                                                                                                    | -1.134546 | -0.289329 | -0.444917 |
| C                                                                                                                                                                                                    | 0.000020  | 0.391401  | 0.290499  | C                                                                                                                                                                                                    | 0.000000  | 0.635641  | -0.348359 |
| C                                                                                                                                                                                                    | -1.139372 | -0.528010 | 0.420153  | C                                                                                                                                                                                                    | 1.134547  | -0.289329 | -0.444916 |
| H                                                                                                                                                                                                    | -1.448778 | -1.039279 | 1.330433  | H                                                                                                                                                                                                    | 1.906249  | -0.189980 | -1.209609 |
| F                                                                                                                                                                                                    | 2.261604  | -0.125904 | -0.278359 | F                                                                                                                                                                                                    | -1.897995 | -0.411450 | 0.775889  |
| F                                                                                                                                                                                                    | 0.000051  | 1.690580  | -0.023122 | F                                                                                                                                                                                                    | 0.000000  | 1.902203  | -0.020338 |
| H                                                                                                                                                                                                    | 1.448799  | -1.039341 | 1.330445  | H                                                                                                                                                                                                    | -1.906249 | -0.189981 | -1.209610 |
| F                                                                                                                                                                                                    | -2.261664 | -0.125882 | -0.278331 | F                                                                                                                                                                                                    | 1.897995  | -0.411451 | 0.775889  |
| H                                                                                                                                                                                                    | -0.000058 | -1.287734 | -1.476856 | H                                                                                                                                                                                                    | -0.000000 | -2.311896 | -0.543845 |
| <b>trans-1,2,4-FBCB(Min)</b>                                                                                                                                                                         |           |           |           | <b>trans-1,2,4-FBCB(TS)</b>                                                                                                                                                                          |           |           |           |

|                                                                                                                                                                                                                                                                                                                                                 |                                                                                                                                                                                                                                                                                                                                                  |
|-------------------------------------------------------------------------------------------------------------------------------------------------------------------------------------------------------------------------------------------------------------------------------------------------------------------------------------------------|--------------------------------------------------------------------------------------------------------------------------------------------------------------------------------------------------------------------------------------------------------------------------------------------------------------------------------------------------|
| Electronic Energy = -453.785864433 au<br>Enthalpy = -453.716334 au<br>Gibbs Free Energy = -453.753177 au<br>Lowest Harmonic Vibrational Frequency (LHVF) = 162.35 cm-1                                                                                                                                                                          | Electronic Energy = -453.745563097 au<br>Enthalpy = -453.677702 au<br>Gibbs Free Energy = -453.714021 au<br>Lowest Harmonic Vibrational Frequency (LHVF) = 194.70i cm-1                                                                                                                                                                          |
| C 0.101453 -0.552737 0.923657<br>C -0.710243 -0.749000 -0.323744<br>C -0.049858 0.558864 -0.127506<br>C 1.260946 0.155947 0.349665<br>F -2.072137 -0.727236 -0.115372<br>F -0.620365 1.772295 -0.147198<br>H -0.467144 -1.455172 -1.111734<br>H -0.200286 -0.707300 1.948390<br>H 1.805660 0.840028 0.991608<br>F 2.164501 -0.506836 -0.488618  | C 0.000026 -1.288020 0.000060<br>C -1.007168 -0.339983 -0.511348<br>C -0.000012 0.591988 0.000020<br>C 1.007228 -0.339927 0.511344<br>F -2.236149 -0.323243 0.258265<br>F -0.000074 1.900078 0.000010<br>H -1.367112 -0.327450 -1.542040<br>H 0.000025 -2.372451 0.000091<br>H 1.367215 -0.327329 1.542019<br>F 2.236159 -0.323181 -0.258333     |
| 2,2,4-FBCB(Min)<br>Electronic Energy = -453.798585462 au<br>Enthalpy = -453.729539 au<br>Gibbs Free Energy = -453.765918 au<br>Lowest Harmonic Vibrational Frequency (LHVF) = 157.30 cm-1                                                                                                                                                       | 2,2,4-FBCB(TS)<br>Electronic Energy = -453.746440771 au<br>Enthalpy = -453.679650 au<br>Gibbs Free Energy = -453.715878 au<br>Lowest Harmonic Vibrational Frequency (LHVF) = 373.61i cm-1                                                                                                                                                        |
| C -0.275709 -0.325265 -0.790738<br>C 0.907665 -0.005514 -0.000050<br>C -0.275746 -0.325468 0.790771<br>C -1.273726 0.441990 0.000036<br>F 1.475362 1.240851 0.000060<br>H -0.443159 -1.118673 -1.503580<br>H -1.347200 1.524804 0.000172<br>F -2.537282 -0.113093 -0.000032<br>F 1.921761 -0.905707 -0.000038<br>H -0.443123 -1.119050 1.503377 | C -0.245555 -0.276125 0.981720<br>C 0.798199 0.016165 -0.000000<br>C -0.245551 -0.276123 -0.981718<br>C -1.319215 -0.549374 -0.000002<br>F 1.917428 -0.816402 0.000000<br>H -0.249847 -0.219928 2.066853<br>H -1.890985 -1.478024 -0.000005<br>F -2.343869 0.467771 -0.000001<br>F 1.366818 1.285367 0.000000<br>H -0.249838 -0.219932 -2.066851 |
| 1,2,2,3-FBCB(Min)<br>Electronic Energy = -553.038861739 au<br>Enthalpy = -552.976476 au<br>Gibbs Free Energy = -553.015500 au<br>Lowest Harmonic Vibrational Frequency (LHVF) = 145.93 cm-1                                                                                                                                                     | 1,2,2,3-FBCB(TS)<br>Electronic Energy = -553.011968486 au<br>Enthalpy = -552.950985 au<br>Gibbs Free Energy = -552.989091 au<br>Lowest Harmonic Vibrational Frequency (LHVF) = 110.82i cm-1                                                                                                                                                      |
| C -0.486589 -0.766016 0.118889<br>C 0.765121 -0.000051 0.090786<br>C -0.486563 0.765979 0.118764<br>C -1.279424 0.000078 1.131224<br>F 1.443455 -0.000105 -1.078367<br>H -2.349536 0.000119 0.930988<br>F 1.691111 0.000014 1.098336<br>H -1.016120 0.000162 2.186917<br>F -0.884398 1.767815 -0.669791<br>F -0.884569 -1.767749 -0.669720      | C 0.917684 0.516921 -0.000042<br>C 0.000002 -0.595673 0.000163<br>C -0.917688 0.516918 -0.000052<br>C -0.000004 1.710474 0.000477<br>F -0.000002 -1.489293 1.083710<br>H -0.000012 2.341886 0.899561<br>F 0.000009 -1.489458 -1.083380<br>H 0.000016 2.342523 -0.898155<br>F -2.229830 0.512913 -0.000427<br>F 2.229827 0.512921 -0.000423       |
| 1,2,2,4-FBCB(Min)<br>Electronic Energy = -553.050483972 au<br>Enthalpy = -552.988498 au<br>Gibbs Free Energy = -553.027260 au<br>Lowest Harmonic Vibrational Frequency (LHVF) = 139.95 cm-1                                                                                                                                                     | 1,2,2,4-FBCB(TS)<br>Electronic Energy = -553.022930046 au<br>Enthalpy = -552.962419 au<br>Gibbs Free Energy = -553.000367 au<br>Lowest Harmonic Vibrational Frequency (LHVF) = 156.45i cm-1                                                                                                                                                      |
| C 0.151733 -0.569046 0.875405<br>C -0.997646 -0.177204 0.056589<br>C 0.264673 0.433399 -0.330486<br>C 1.178368 -0.719742 -0.205720<br>F -1.915800 0.630191 0.635936<br>F -1.679152 -1.058381 -0.738398<br>H 1.229031 -1.554073 -0.899595                                                                                                        | C 0.128800 -1.239110 -0.347129<br>C -0.876396 -0.244047 0.011496<br>C 0.262300 0.653696 -0.177190<br>C 1.287409 -0.336874 -0.542692<br>F -1.468116 -0.303583 1.263931<br>F -1.967609 -0.081884 -0.834974<br>H 1.840590 -0.281295 -1.481403                                                                                                       |

|                                                                                                                                                                                                          |           |           |           |                                                                                                                                                                                                         |           |           |           |
|----------------------------------------------------------------------------------------------------------------------------------------------------------------------------------------------------------|-----------|-----------|-----------|---------------------------------------------------------------------------------------------------------------------------------------------------------------------------------------------------------|-----------|-----------|-----------|
| F                                                                                                                                                                                                        | 0.578957  | 1.718591  | -0.473884 | F                                                                                                                                                                                                       | 0.373099  | 1.933437  | 0.031238  |
| F                                                                                                                                                                                                        | 2.448499  | -0.370231 | 0.196352  | F                                                                                                                                                                                                       | 2.315837  | -0.481262 | 0.449112  |
| H                                                                                                                                                                                                        | 0.295666  | -0.531889 | 1.944813  | H                                                                                                                                                                                                       | 0.067827  | -2.321071 | -0.369282 |
| <b>cis-1,2,3,4-FBCB(Min)</b><br>Electronic Energy = -553.024155576 au<br>Enthalpy = -552.961568 au<br>Gibbs Free Energy = -553.000941 au<br>Lowest Harmonic Vibrational Frequency (LHVF) = 123.02 cm-1   |           |           |           | <b>cis-1,2,3,4-FBCB(TS)</b><br>Electronic Energy = -553.015594128 au<br>Enthalpy = -552.954266 au<br>Gibbs Free Energy = -552.992398 au<br>Lowest Harmonic Vibrational Frequency (LHVF) = 71.79i cm-1   |           |           |           |
| C                                                                                                                                                                                                        | 0.000000  | -0.763530 | 0.149740  | C                                                                                                                                                                                                       | -0.000024 | 0.903833  | -0.369325 |
| C                                                                                                                                                                                                        | 1.145915  | -0.000001 | 0.698618  | C                                                                                                                                                                                                       | 1.154616  | 0.000031  | -0.457024 |
| C                                                                                                                                                                                                        | -0.000001 | 0.763529  | 0.149745  | C                                                                                                                                                                                                       | 0.000024  | -0.903834 | -0.369325 |
| C                                                                                                                                                                                                        | -1.145917 | -0.000004 | 0.698616  | C                                                                                                                                                                                                       | -1.154617 | -0.000031 | -0.457023 |
| F                                                                                                                                                                                                        | 2.245237  | 0.000002  | -0.141084 | F                                                                                                                                                                                                       | 1.993741  | 0.000054  | 0.705573  |
| H                                                                                                                                                                                                        | -1.492817 | -0.000008 | 1.732105  | H                                                                                                                                                                                                       | -1.863538 | -0.000050 | -1.287337 |
| F                                                                                                                                                                                                        | -0.000001 | 1.849261  | -0.616936 | F                                                                                                                                                                                                       | 0.000059  | -2.165990 | -0.011636 |
| F                                                                                                                                                                                                        | -2.245237 | -0.000001 | -0.141088 | F                                                                                                                                                                                                       | -1.993741 | -0.000053 | 0.705573  |
| H                                                                                                                                                                                                        | 1.492813  | -0.000005 | 1.732109  | H                                                                                                                                                                                                       | 1.863538  | 0.000050  | -1.287338 |
| F                                                                                                                                                                                                        | 0.000003  | -1.849256 | -0.616950 | F                                                                                                                                                                                                       | -0.000058 | 2.165990  | -0.011636 |
| <b>trans-1,2,3,4-FBCB(Min)</b><br>Electronic Energy = -553.036313990 au<br>Enthalpy = -552.973628 au<br>Gibbs Free Energy = -553.012930 au<br>Lowest Harmonic Vibrational Frequency (LHVF) = 131.47 cm-1 |           |           |           | <b>trans-1,2,3,4-FBCB(TS)</b><br>Electronic Energy = -553.017439854 au<br>Enthalpy = -552.956060 au<br>Gibbs Free Energy = -552.994234 au<br>Lowest Harmonic Vibrational Frequency (LHVF) = 81.75i cm-1 |           |           |           |
| C                                                                                                                                                                                                        | 0.045216  | 0.772500  | -0.153215 | C                                                                                                                                                                                                       | -0.000075 | 0.916216  | -0.000404 |
| C                                                                                                                                                                                                        | 1.282214  | 0.000003  | -0.254890 | C                                                                                                                                                                                                       | -1.025400 | -0.000006 | 0.507436  |
| C                                                                                                                                                                                                        | 0.045220  | -0.772498 | -0.153216 | C                                                                                                                                                                                                       | -0.000065 | -0.916216 | -0.000404 |
| C                                                                                                                                                                                                        | -0.706490 | -0.000001 | 0.876861  | C                                                                                                                                                                                                       | 1.025596  | 0.000006  | -0.507507 |
| F                                                                                                                                                                                                        | 2.236426  | 0.000004  | 0.769219  | F                                                                                                                                                                                                       | -2.249568 | -0.000013 | -0.258847 |
| F                                                                                                                                                                                                        | -0.377666 | -1.817382 | -0.864709 | F                                                                                                                                                                                                       | 0.000110  | -2.226318 | -0.000115 |
| H                                                                                                                                                                                                        | 1.792121  | 0.000003  | -1.214713 | H                                                                                                                                                                                                       | -1.379011 | -0.000009 | 1.541186  |
| F                                                                                                                                                                                                        | -0.377677 | 1.817380  | -0.864710 | F                                                                                                                                                                                                       | 0.000084  | 2.226319  | -0.000115 |
| F                                                                                                                                                                                                        | -2.068828 | -0.000004 | 0.668775  | F                                                                                                                                                                                                       | 2.249240  | 0.000012  | 0.259644  |
| H                                                                                                                                                                                                        | -0.499360 | -0.000001 | 1.944287  | H                                                                                                                                                                                                       | 1.379884  | 0.000009  | -1.541010 |
| <b>2,2,4,4-FBCB(Min)</b><br>Electronic Energy = -553.069795634 au<br>Enthalpy = -553.008196 au<br>Gibbs Free Energy = -553.046276 au<br>Lowest Harmonic Vibrational Frequency (LHVF) = 143.13 cm-1       |           |           |           | <b>2,2,4,4-FBCB(TS)</b><br>Electronic Energy = -553.026065837 au<br>Enthalpy = -552.966815 au<br>Gibbs Free Energy = -553.004736 au<br>Lowest Harmonic Vibrational Frequency (LHVF) = 326.01i cm-1      |           |           |           |
| C                                                                                                                                                                                                        | -0.000037 | -0.537181 | 0.811478  | C                                                                                                                                                                                                       | -0.000001 | 0.000185  | 0.991078  |
| C                                                                                                                                                                                                        | 1.107944  | -0.020253 | -0.000001 | C                                                                                                                                                                                                       | -1.082091 | 0.000032  | -0.000000 |
| C                                                                                                                                                                                                        | -0.000038 | -0.537165 | -0.811493 | C                                                                                                                                                                                                       | 0.000001  | 0.000184  | -0.991079 |
| C                                                                                                                                                                                                        | -1.107913 | -0.020022 | -0.000001 | C                                                                                                                                                                                                       | 1.082092  | 0.000036  | 0.000002  |
| F                                                                                                                                                                                                        | 2.244333  | -0.761943 | -0.000015 | F                                                                                                                                                                                                       | -1.943806 | 1.086035  | -0.000002 |
| H                                                                                                                                                                                                        | -0.000149 | -1.357718 | 1.514832  | H                                                                                                                                                                                                       | -0.000002 | 0.000279  | 2.076809  |
| H                                                                                                                                                                                                        | -0.000150 | -1.357691 | -1.514882 | H                                                                                                                                                                                                       | 0.000002  | 0.000287  | -2.076809 |
| F                                                                                                                                                                                                        | -2.244348 | -0.761927 | -0.000014 | F                                                                                                                                                                                                       | 1.943810  | 1.086032  | 0.000002  |
| F                                                                                                                                                                                                        | -1.476286 | 1.284324  | 0.000023  | F                                                                                                                                                                                                       | 1.943504  | -1.086211 | -0.000002 |
| F                                                                                                                                                                                                        | 1.476364  | 1.284339  | 0.000022  | F                                                                                                                                                                                                       | -1.943508 | -1.086209 | 0.000001  |
| <b>1,2,2,4,4-FBCB(Min)</b><br>Electronic Energy = -652.321878863 au<br>Enthalpy = -652.267383 au<br>Gibbs Free Energy = -652.307901 au<br>Lowest Harmonic Vibrational Frequency (LHVF) = 124.47 cm-1     |           |           |           | <b>1,2,2,4,4-FBCB(TS)</b><br>Electronic Energy = -652.299126866 au<br>Enthalpy = -652.246065 au<br>Gibbs Free Energy = -652.285671 au<br>Lowest Harmonic Vibrational Frequency (LHVF) = 127.51i cm-1    |           |           |           |
| C                                                                                                                                                                                                        | 0.000000  | -0.165631 | 1.061479  | C                                                                                                                                                                                                       | -0.000000 | -1.229484 | 0.000563  |
| C                                                                                                                                                                                                        | -1.121977 | -0.226988 | 0.111648  | C                                                                                                                                                                                                       | -1.103992 | -0.267036 | 0.000049  |
| C                                                                                                                                                                                                        | -0.000000 | 0.568524  | -0.391656 | C                                                                                                                                                                                                       | 0.000000  | 0.700679  | -0.000118 |

|                                                                              |           |           |           |                                                                         |           |           |           |
|------------------------------------------------------------------------------|-----------|-----------|-----------|-------------------------------------------------------------------------|-----------|-----------|-----------|
| C                                                                            | 1.121977  | -0.226988 | 0.111648  | C                                                                       | 1.103992  | -0.267037 | 0.000048  |
| F                                                                            | -2.226941 | 0.472604  | 0.460224  | F                                                                       | -1.961741 | -0.257356 | 1.084276  |
| H                                                                            | -0.000000 | 0.162611  | 2.091331  | H                                                                       | -0.000000 | -2.312865 | 0.001251  |
| F                                                                            | 2.226941  | 0.472604  | 0.460224  | F                                                                       | 1.961739  | -0.257357 | 1.084277  |
| F                                                                            | 1.538333  | -1.378553 | -0.471273 | F                                                                       | 1.961530  | -0.258083 | -1.084338 |
| F                                                                            | -1.538334 | -1.378553 | -0.471273 | F                                                                       | -1.961529 | -0.258083 | -1.084339 |
| F                                                                            | 0.000000  | 1.827885  | -0.805685 | F                                                                       | 0.000000  | 1.996449  | -0.000377 |
| <b>1,2,3,4,4-FBCB(Min)</b>                                                   |           |           |           | <b>1,2,3,4,4-FBCB(TS)</b>                                               |           |           |           |
| Electronic Energy = -652.298675343 au                                        |           |           |           | Electronic Energy = -652.291239405 au                                   |           |           |           |
| Enthalpy = -652.243441 au                                                    |           |           |           | Enthalpy = -652.237141 au                                               |           |           |           |
| Gibbs Free Energy = -652.284772 au                                           |           |           |           | Gibbs Free Energy = -652.277000 au                                      |           |           |           |
| Lowest Harmonic Vibrational Frequency (LHVF) = 103.04 cm <sup>-1</sup>       |           |           |           | Lowest Harmonic Vibrational Frequency (LHVF) = 65.01i cm <sup>-1</sup>  |           |           |           |
| C                                                                            | 0.179830  | -0.796908 | 0.000504  | C                                                                       | -0.189239 | 0.926933  | -0.197155 |
| C                                                                            | 1.156771  | -0.000001 | -0.787147 | C                                                                       | -1.287514 | 0.000001  | -0.526177 |
| C                                                                            | 0.179830  | 0.796909  | 0.000501  | C                                                                       | -0.189240 | -0.926934 | -0.197155 |
| C                                                                            | -1.031728 | 0.000001  | -0.166544 | C                                                                       | 0.916052  | -0.000000 | 0.017205  |
| F                                                                            | -1.787088 | -0.000001 | -1.311247 | F                                                                       | 1.972903  | -0.000001 | -0.883874 |
| F                                                                            | -1.901300 | 0.000002  | 0.871893  | F                                                                       | 1.555718  | -0.000000 | 1.242114  |
| F                                                                            | 2.417303  | -0.000001 | -0.224687 | F                                                                       | -2.350102 | 0.000001  | 0.426457  |
| F                                                                            | 0.404560  | 1.862181  | 0.753541  | F                                                                       | -0.239554 | -2.217185 | -0.008317 |
| F                                                                            | 0.404558  | -1.862182 | 0.753542  | F                                                                       | -0.239552 | 2.217185  | -0.008317 |
| H                                                                            | 1.249478  | -0.000002 | -1.871268 | H                                                                       | -1.795070 | 0.000001  | -1.492870 |
| <b>Perfluoro-FBCB(Min)</b>                                                   |           |           |           | <b>Perfluoro-FBCB(TS)</b>                                               |           |           |           |
| Electronic Energy = -751.570549088 au                                        |           |           |           | Electronic Energy = -751.564752544 au                                   |           |           |           |
| Enthalpy = -751.522826 au                                                    |           |           |           | Enthalpy = -751.518010 au                                               |           |           |           |
| Gibbs Free Energy = -751.566145 au                                           |           |           |           | Gibbs Free Energy = -751.559555 au                                      |           |           |           |
| Lowest Harmonic Vibrational Frequency (LHVF) = 77.20 cm <sup>-1</sup>        |           |           |           | Lowest Harmonic Vibrational Frequency (LHVF) = 50.20i cm <sup>-1</sup>  |           |           |           |
| C                                                                            | 0.000004  | 0.845405  | -0.165799 | C                                                                       | 0.000000  | 0.944617  | -0.000151 |
| C                                                                            | -1.129625 | -0.000004 | 0.238463  | C                                                                       | 1.120577  | -0.000000 | 0.000144  |
| C                                                                            | 0.000002  | -0.845442 | -0.165735 | C                                                                       | -0.000001 | -0.944612 | -0.000156 |
| C                                                                            | 1.129615  | -0.000005 | 0.238505  | C                                                                       | -1.120575 | -0.000001 | 0.000143  |
| F                                                                            | 2.190148  | -0.000017 | -0.607022 | F                                                                       | -1.974904 | -0.000005 | 1.083315  |
| F                                                                            | 1.639452  | 0.000052  | 1.501151  | F                                                                       | -1.975333 | 0.000004  | -1.082668 |
| F                                                                            | -1.639507 | 0.000050  | 1.501089  | F                                                                       | 1.975333  | 0.000001  | -1.082668 |
| F                                                                            | 0.000015  | -1.908096 | -0.942499 | F                                                                       | -0.000001 | -2.243792 | -0.000642 |
| F                                                                            | 0.000021  | 1.908053  | -0.942571 | F                                                                       | -0.000001 | 2.243792  | -0.000637 |
| F                                                                            | -2.190125 | -0.000010 | -0.607104 | F                                                                       | 1.974906  | -0.000003 | 1.083314  |
| <b>Dibenzylamine Attack to Sulfonylated BCBs [SMD(DMSO)/B3LYP/6-311+G**]</b> |           |           |           |                                                                         |           |           |           |
| <b>4-OMe (TS<sub>N</sub>)</b>                                                |           |           |           | <b>4-Me (TS<sub>N</sub>)</b>                                            |           |           |           |
| Electronic Energy = -1647.734603 au                                          |           |           |           | Electronic Energy = -1572.502521 au                                     |           |           |           |
| Enthalpy = -1647.240686 au                                                   |           |           |           | Enthalpy = -1572.014626 au                                              |           |           |           |
| Gibbs Free Energy = -1647.333649 au                                          |           |           |           | Gibbs Free Energy = -1572.105808 au                                     |           |           |           |
| Lowest Harmonic Vibrational Frequency (LHVF) = 375.24i cm <sup>-1</sup>      |           |           |           | Lowest Harmonic Vibrational Frequency (LHVF) = 385.17i cm <sup>-1</sup> |           |           |           |
| C                                                                            | 1.304318  | 1.084685  | -2.371821 | C                                                                       | -1.145497 | -2.772507 | 0.018316  |
| C                                                                            | 0.239870  | -0.010147 | -2.596353 | C                                                                       | -0.286131 | -2.254423 | -1.153004 |
| C                                                                            | 0.087017  | 0.393013  | -1.174146 | C                                                                       | -0.026937 | -1.312554 | -0.032936 |
| C                                                                            | 0.480071  | 1.821039  | -1.298664 | C                                                                       | -0.194690 | -2.245950 | 1.111365  |
| H                                                                            | -0.262850 | 2.498033  | -1.728443 | H                                                                       | 0.628732  | -2.932451 | 1.321350  |
| H                                                                            | 0.988769  | 2.273970  | -0.450445 | H                                                                       | -0.610249 | -1.830311 | 2.028027  |
| H                                                                            | 0.600519  | -0.201434 | -0.428701 | H                                                                       | -0.598928 | -0.393723 | -0.012861 |
| H                                                                            | -0.547274 | 0.308818  | -3.284742 | H                                                                       | 0.518223  | -2.942490 | -1.421996 |
| H                                                                            | 0.557998  | -1.031256 | -2.797619 | H                                                                       | -0.776323 | -1.848583 | -2.036519 |
| S                                                                            | 2.979023  | 0.709150  | -2.148654 | S                                                                       | -2.858236 | -2.575840 | 0.090974  |
| O                                                                            | 3.407097  | -0.124068 | -3.300922 | O                                                                       | -3.426115 | -3.136859 | -1.161283 |
| O                                                                            | 3.690991  | 1.987169  | -1.893932 | O                                                                       | -3.314214 | -3.133074 | 1.389808  |
| C                                                                            | 3.307389  | -0.309132 | -0.682910 | C                                                                       | -3.403653 | -0.840896 | 0.114215  |
| C                                                                            | 3.557369  | 0.297553  | 0.545978  | C                                                                       | -3.497182 | -0.158259 | 1.330002  |

|                                                                         |           |           |           |                                                                         |           |           |           |
|-------------------------------------------------------------------------|-----------|-----------|-----------|-------------------------------------------------------------------------|-----------|-----------|-----------|
| C                                                                       | 3.248231  | -1.705112 | -0.772152 | C                                                                       | -3.693749 | -0.185453 | -1.081960 |
| C                                                                       | 3.752163  | -0.476654 | 1.690146  | C                                                                       | -3.885425 | 1.177934  | 1.339356  |
| H                                                                       | 3.618073  | 1.376419  | 0.616670  | H                                                                       | -3.286002 | -0.671296 | 2.260166  |
| C                                                                       | 3.441266  | -2.480266 | 0.361091  | C                                                                       | -4.083299 | 1.153219  | -1.055864 |
| H                                                                       | 3.068244  | -2.183044 | -1.727138 | H                                                                       | -3.634819 | -0.718644 | -2.022709 |
| C                                                                       | 3.692396  | -1.872520 | 1.601431  | C                                                                       | -4.186841 | 1.856441  | 0.149559  |
| N                                                                       | -1.793096 | -0.003327 | -0.383760 | N                                                                       | 1.831480  | -0.366546 | -0.096753 |
| H                                                                       | -2.393695 | 0.614258  | -0.926332 | H                                                                       | 1.919627  | -0.004729 | 0.850956  |
| C                                                                       | -2.108553 | -1.412570 | -0.709504 | C                                                                       | 2.868199  | -1.398574 | -0.329540 |
| H                                                                       | -1.460374 | -2.044051 | -0.097713 | H                                                                       | 2.767201  | -1.741287 | -1.360913 |
| H                                                                       | -1.832103 | -1.566266 | -1.754986 | H                                                                       | 2.633064  | -2.239810 | 0.325587  |
| C                                                                       | -1.894958 | 0.320218  | 1.057221  | C                                                                       | 1.858911  | 0.745539  | -1.074656 |
| H                                                                       | -2.818286 | -0.107163 | 1.466596  | H                                                                       | 2.898107  | 1.008891  | -1.303562 |
| H                                                                       | -1.058104 | -0.167064 | 1.563760  | H                                                                       | 1.403002  | 0.383299  | -1.999925 |
| C                                                                       | -1.875812 | 1.807402  | 1.331079  | C                                                                       | 1.136871  | 1.978938  | -0.581677 |
| C                                                                       | -2.909800 | 2.630708  | 0.865294  | C                                                                       | 1.639676  | 2.705128  | 0.506839  |
| C                                                                       | -0.847828 | 2.382705  | 2.084406  | C                                                                       | -0.018531 | 2.439761  | -1.220171 |
| C                                                                       | -2.908532 | 3.997656  | 1.136960  | C                                                                       | 0.998431  | 3.860505  | 0.948799  |
| H                                                                       | -3.724746 | 2.199841  | 0.291136  | H                                                                       | 2.543527  | 2.369041  | 1.006005  |
| C                                                                       | -0.848045 | 3.749868  | 2.365435  | C                                                                       | -0.658071 | 3.601888  | -0.785025 |
| H                                                                       | -0.042306 | 1.756717  | 2.454165  | H                                                                       | -0.416458 | 1.889981  | -2.066825 |
| C                                                                       | -1.876583 | 4.561761  | 1.889310  | C                                                                       | -0.152895 | 4.313728  | 0.301751  |
| H                                                                       | -3.716054 | 4.621080  | 0.768314  | H                                                                       | 1.401352  | 4.411860  | 1.791593  |
| H                                                                       | -0.043410 | 4.179272  | 2.952661  | H                                                                       | -1.550733 | 3.948091  | -1.294381 |
| H                                                                       | -1.877097 | 5.624805  | 2.104293  | H                                                                       | -0.649271 | 5.216223  | 0.641457  |
| C                                                                       | -3.559977 | -1.800213 | -0.506258 | C                                                                       | 4.289967  | -0.936146 | -0.072516 |
| C                                                                       | -3.947998 | -2.613111 | 0.564036  | C                                                                       | 5.193751  | -0.760754 | -1.125465 |
| C                                                                       | -4.543169 | -1.343071 | -1.394443 | C                                                                       | 4.723934  | -0.680682 | 1.235433  |
| C                                                                       | -5.287926 | -2.960054 | 0.747494  | C                                                                       | 6.501500  | -0.336787 | -0.880689 |
| H                                                                       | -3.196645 | -2.981755 | 1.255152  | H                                                                       | 4.874114  | -0.962047 | -2.142992 |
| C                                                                       | -5.881725 | -1.684988 | -1.212538 | C                                                                       | 6.027167  | -0.254537 | 1.483203  |
| H                                                                       | -4.256919 | -0.720106 | -2.236699 | H                                                                       | 4.037385  | -0.821412 | 2.065192  |
| C                                                                       | -6.258212 | -2.494906 | -0.138891 | C                                                                       | 6.920687  | -0.080947 | 0.423876  |
| H                                                                       | -5.571475 | -3.592821 | 1.581721  | H                                                                       | 7.190236  | -0.207442 | -1.708726 |
| H                                                                       | -6.630094 | -1.325913 | -1.910917 | H                                                                       | 6.348466  | -0.064818 | 2.501784  |
| H                                                                       | -7.299463 | -2.764053 | 0.001454  | H                                                                       | 7.936381  | 0.247295  | 0.616143  |
| H                                                                       | 3.409118  | -3.562262 | 0.301899  | H                                                                       | -4.315773 | 1.655998  | -1.989163 |
| H                                                                       | 3.954889  | 0.015690  | 2.631654  | H                                                                       | -3.963564 | 1.700843  | 2.287525  |
| O                                                                       | 3.869918  | -2.715089 | 2.651148  | C                                                                       | -4.628643 | 3.296912  | 0.177948  |
| C                                                                       | 4.144374  | -2.154629 | 3.941173  | H                                                                       | -5.635512 | 3.387138  | 0.600564  |
| H                                                                       | 4.249550  | -3.003824 | 4.614805  | H                                                                       | -3.964165 | 3.903129  | 0.800272  |
| H                                                                       | 5.074894  | -1.579678 | 3.932668  | H                                                                       | -4.648867 | 3.726837  | -0.825526 |
| H                                                                       | 3.320020  | -1.520830 | 4.280965  |                                                                         |           |           |           |
| <b>4-F (TS<sub>N</sub>)</b>                                             |           |           |           | <b>4-Cl (TS<sub>N</sub>)</b>                                            |           |           |           |
| Electronic Energy = -1632.443994 au                                     |           |           |           | Electronic Energy = -1992.799002 au                                     |           |           |           |
| Enthalpy = -1631.992519 au                                              |           |           |           | Enthalpy = -1992.348476 au                                              |           |           |           |
| Gibbs Free Energy = -1632.081693 au                                     |           |           |           | Gibbs Free Energy = -1992.439408 au                                     |           |           |           |
| Lowest Harmonic Vibrational Frequency (LHVF) = 371.51i cm <sup>-1</sup> |           |           |           | Lowest Harmonic Vibrational Frequency (LHVF) = 370.60i cm <sup>-1</sup> |           |           |           |
| C                                                                       | 1.666602  | 0.291192  | -2.275847 | C                                                                       | 1.372085  | 1.321807  | -2.190873 |
| C                                                                       | 0.557709  | -0.780386 | -2.289264 | C                                                                       | 0.342635  | 0.226948  | -2.533851 |
| C                                                                       | 0.322057  | 0.017552  | -1.058176 | C                                                                       | 0.139507  | 0.529652  | -1.093515 |
| C                                                                       | 0.807185  | 1.336197  | -1.541352 | C                                                                       | 0.494636  | 1.972245  | -1.106738 |
| H                                                                       | 0.144590  | 1.885387  | -2.215113 | H                                                                       | -0.249090 | 2.657182  | -1.521453 |
| H                                                                       | 1.273074  | 1.994733  | -0.811905 | H                                                                       | 0.962639  | 2.379655  | -0.213578 |
| H                                                                       | 0.730269  | -0.358978 | -0.128664 | H                                                                       | 0.633982  | -0.104399 | -0.368559 |
| H                                                                       | -0.149400 | -0.638479 | -3.110541 | H                                                                       | -0.428241 | 0.579057  | -3.224075 |
| H                                                                       | 0.825578  | -1.827793 | -2.165594 | H                                                                       | 0.691709  | -0.770276 | -2.793866 |
| S                                                                       | 3.292341  | -0.062909 | -1.814147 | S                                                                       | 3.046959  | 0.978697  | -1.953458 |
| O                                                                       | 3.764508  | -1.192954 | -2.651342 | O                                                                       | 3.535795  | 0.253931  | -3.151426 |

|                                                                                                                                                                                                                                    |           |           |           |                                                                                                                                                                                                                           |           |           |           |
|------------------------------------------------------------------------------------------------------------------------------------------------------------------------------------------------------------------------------------|-----------|-----------|-----------|---------------------------------------------------------------------------------------------------------------------------------------------------------------------------------------------------------------------------|-----------|-----------|-----------|
| O                                                                                                                                                                                                                                  | 4.054744  | 1.209481  | -1.837166 | O                                                                                                                                                                                                                         | 3.717550  | 2.241286  | -1.558957 |
| C                                                                                                                                                                                                                                  | 3.438174  | -0.660456 | -0.099608 | C                                                                                                                                                                                                                         | 3.347784  | -0.160681 | -0.564239 |
| C                                                                                                                                                                                                                                  | 3.609317  | 0.257138  | 0.939078  | C                                                                                                                                                                                                                         | 3.339108  | -1.538853 | -0.785429 |
| C                                                                                                                                                                                                                                  | 3.317187  | -2.025874 | 0.168098  | C                                                                                                                                                                                                                         | 3.520570  | 0.350240  | 0.723012  |
| C                                                                                                                                                                                                                                  | 3.658224  | -0.189623 | 2.257770  | C                                                                                                                                                                                                                         | 3.500272  | -2.414602 | 0.285724  |
| H                                                                                                                                                                                                                                  | 3.719626  | 1.312121  | 0.723469  | H                                                                                                                                                                                                                         | 3.222123  | -1.931844 | -1.787406 |
| C                                                                                                                                                                                                                                  | 3.364528  | -2.481212 | 1.483779  | C                                                                                                                                                                                                                         | 3.682628  | -0.519492 | 1.798821  |
| H                                                                                                                                                                                                                                  | 3.201718  | -2.733560 | -0.642786 | H                                                                                                                                                                                                                         | 3.543697  | 1.419699  | 0.889261  |
| C                                                                                                                                                                                                                                  | 3.530944  | -1.548666 | 2.495050  | C                                                                                                                                                                                                                         | 3.665380  | -1.890968 | 1.564443  |
| N                                                                                                                                                                                                                                  | -1.652314 | -0.063482 | -0.368271 | N                                                                                                                                                                                                                         | -1.773036 | 0.027382  | -0.393592 |
| H                                                                                                                                                                                                                                  | -2.160300 | 0.440974  | -1.092396 | H                                                                                                                                                                                                                         | -2.376831 | 0.641443  | -0.936490 |
| C                                                                                                                                                                                                                                  | -2.053105 | -1.487922 | -0.382870 | C                                                                                                                                                                                                                         | -2.010299 | -1.378339 | -0.789465 |
| H                                                                                                                                                                                                                                  | -1.493563 | -1.994412 | 0.406940  | H                                                                                                                                                                                                                         | -1.352828 | -2.006275 | -0.183776 |
| H                                                                                                                                                                                                                                  | -1.725578 | -1.900006 | -1.339907 | H                                                                                                                                                                                                                         | -1.693204 | -1.472799 | -1.830590 |
| C                                                                                                                                                                                                                                  | -1.834483 | 0.599520  | 0.942064  | C                                                                                                                                                                                                                         | -1.946750 | 0.284713  | 1.052870  |
| H                                                                                                                                                                                                                                  | -2.834335 | 0.376214  | 1.334182  | H                                                                                                                                                                                                                         | -2.869639 | -0.191905 | 1.405622  |
| H                                                                                                                                                                                                                                  | -1.109097 | 0.163967  | 1.633703  | H                                                                                                                                                                                                                         | -1.114058 | -0.193573 | 1.574805  |
| C                                                                                                                                                                                                                                  | -1.652708 | 2.099402  | 0.875103  | C                                                                                                                                                                                                                         | -1.993081 | 1.758555  | 1.388829  |
| C                                                                                                                                                                                                                                  | -2.533110 | 2.891771  | 0.126421  | C                                                                                                                                                                                                                         | -1.030794 | 2.331190  | 2.226305  |
| C                                                                                                                                                                                                                                  | -0.625422 | 2.727007  | 1.586586  | C                                                                                                                                                                                                                         | -3.023916 | 2.570051  | 0.896415  |
| C                                                                                                                                                                                                                                  | -2.381815 | 4.276502  | 0.081436  | C                                                                                                                                                                                                                         | -1.091774 | 3.684306  | 2.563267  |
| H                                                                                                                                                                                                                                  | -3.346168 | 2.423805  | -0.420721 | H                                                                                                                                                                                                                         | -0.229066 | 1.714017  | 2.618495  |
| C                                                                                                                                                                                                                                  | -0.476259 | 4.114278  | 1.550624  | C                                                                                                                                                                                                                         | -3.082899 | 3.923428  | 1.224034  |
| H                                                                                                                                                                                                                                  | 0.061691  | 2.126380  | 2.173729  | H                                                                                                                                                                                                                         | -3.789606 | 2.141056  | 0.256814  |
| C                                                                                                                                                                                                                                  | -1.351891 | 4.892580  | 0.794791  | C                                                                                                                                                                                                                         | -2.115960 | 4.485165  | 2.059858  |
| H                                                                                                                                                                                                                                  | -3.071447 | 4.875220  | -0.503884 | H                                                                                                                                                                                                                         | -0.337592 | 4.111468  | 3.215529  |
| H                                                                                                                                                                                                                                  | 0.325291  | 4.584702  | 2.109982  | H                                                                                                                                                                                                                         | -3.886997 | 4.537808  | 0.833357  |
| H                                                                                                                                                                                                                                  | -1.235864 | 5.970466  | 0.763366  | H                                                                                                                                                                                                                         | -2.163437 | 5.537512  | 2.317933  |
| C                                                                                                                                                                                                                                  | -3.539214 | -1.732479 | -0.207985 | C                                                                                                                                                                                                                         | -3.447070 | -1.842951 | -0.652457 |
| C                                                                                                                                                                                                                                  | -4.051738 | -2.244956 | 0.988524  | C                                                                                                                                                                                                                         | -4.424509 | -1.385050 | -1.546424 |
| C                                                                                                                                                                                                                                  | -4.428927 | -1.444524 | -1.251845 | C                                                                                                                                                                                                                         | -3.827367 | -2.727803 | 0.362033  |
| C                                                                                                                                                                                                                                  | -5.422308 | -2.461757 | 1.142984  | C                                                                                                                                                                                                                         | -5.750291 | -1.796366 | -1.424374 |
| H                                                                                                                                                                                                                                  | -3.373872 | -2.480365 | 1.802873  | H                                                                                                                                                                                                                         | -4.143687 | -0.706179 | -2.346229 |
| C                                                                                                                                                                                                                                  | -5.797785 | -1.656926 | -1.100108 | C                                                                                                                                                                                                                         | -5.154291 | -3.144360 | 0.485447  |
| H                                                                                                                                                                                                                                  | -4.045887 | -1.056495 | -2.191019 | H                                                                                                                                                                                                                         | -3.080087 | -3.097011 | 1.057278  |
| C                                                                                                                                                                                                                                  | -6.298757 | -2.166332 | 0.099824  | C                                                                                                                                                                                                                         | -6.119310 | -2.677886 | -0.405959 |
| H                                                                                                                                                                                                                                  | -5.803049 | -2.861279 | 2.076854  | H                                                                                                                                                                                                                         | -6.494148 | -1.435301 | -2.126546 |
| H                                                                                                                                                                                                                                  | -6.472803 | -1.432361 | -1.919030 | H                                                                                                                                                                                                                         | -5.431946 | -3.831832 | 1.277282  |
| H                                                                                                                                                                                                                                  | -7.363608 | -2.335439 | 0.217541  | H                                                                                                                                                                                                                         | -7.150392 | -3.001000 | -0.312181 |
| H                                                                                                                                                                                                                                  | 3.281777  | -3.535153 | 1.720359  | H                                                                                                                                                                                                                         | 3.824480  | -0.131331 | 2.799653  |
| H                                                                                                                                                                                                                                  | 3.798436  | 0.498782  | 3.082397  | H                                                                                                                                                                                                                         | 3.502436  | -3.484938 | 0.121580  |
| F                                                                                                                                                                                                                                  | 3.579025  | -1.990209 | 3.784225  | Cl                                                                                                                                                                                                                        | 3.866186  | -2.996383 | 2.926134  |
| <b>4-CF<sub>3</sub> (TS<sub>N</sub>)</b><br>Electronic Energy = -1870.324377 au<br>Enthalpy = -1869.857814 au<br>Gibbs Free Energy = -1869.954718 au<br>Lowest Harmonic Vibrational Frequency (LHVF) =<br>369.25i cm <sup>-1</sup> |           |           |           | <b>3,5-DiF (TS<sub>N</sub>)</b><br>Electronic Energy = -1731.710095 au<br>Enthalpy = -1731.266292 au<br>Gibbs Free Energy = -1731.357659 au<br>Lowest Harmonic Vibrational Frequency (LHVF) =<br>362.69i cm <sup>-1</sup> |           |           |           |
| C                                                                                                                                                                                                                                  | -0.621087 | -2.236203 | -1.976101 | C                                                                                                                                                                                                                         | 1.490925  | 0.052572  | -2.385103 |
| C                                                                                                                                                                                                                                  | 0.266340  | -1.102169 | -2.522230 | C                                                                                                                                                                                                                         | 0.399912  | -1.026639 | -2.250095 |
| C                                                                                                                                                                                                                                  | 0.376195  | -1.025302 | -1.041934 | C                                                                                                                                                                                                                         | 0.177310  | -0.078812 | -1.127752 |
| C                                                                                                                                                                                                                                  | 0.239293  | -2.469526 | -0.723050 | C                                                                                                                                                                                                                         | 0.625124  | 1.174263  | -1.787223 |
| H                                                                                                                                                                                                                                  | 1.109379  | -3.100176 | -0.921926 | H                                                                                                                                                                                                                         | -0.057043 | 1.613852  | -2.519011 |
| H                                                                                                                                                                                                                                  | -0.243203 | -2.732033 | 0.215168  | H                                                                                                                                                                                                                         | 1.089148  | 1.932028  | -1.160702 |
| H                                                                                                                                                                                                                                  | -0.265076 | -0.326589 | -0.519933 | H                                                                                                                                                                                                                         | 0.598702  | -0.326017 | -0.161869 |
| H                                                                                                                                                                                                                                  | 1.140401  | -1.475740 | -3.061604 | H                                                                                                                                                                                                                         | -0.319737 | -0.996110 | -3.071665 |
| H                                                                                                                                                                                                                                  | -0.196904 | -0.262075 | -3.035653 | H                                                                                                                                                                                                                         | 0.684488  | -2.045944 | -1.997958 |
| S                                                                                                                                                                                                                                  | -2.341231 | -2.139975 | -1.931132 | S                                                                                                                                                                                                                         | 3.130746  | -0.209182 | -1.929983 |
| O                                                                                                                                                                                                                                  | -2.820106 | -1.863018 | -3.306369 | O                                                                                                                                                                                                                         | 3.616706  | -1.419754 | -2.631969 |
| O                                                                                                                                                                                                                                  | -2.847791 | -3.341133 | -1.225490 | O                                                                                                                                                                                                                         | 3.865147  | 1.065632  | -2.103084 |

|                                                                             |           |           |           |                                                                         |           |           |           |
|-----------------------------------------------------------------------------|-----------|-----------|-----------|-------------------------------------------------------------------------|-----------|-----------|-----------|
| C                                                                           | -2.941405 | -0.728822 | -0.942218 | C                                                                       | 3.313722  | -0.605983 | -0.155239 |
| C                                                                           | -3.159446 | -0.889924 | 0.428262  | C                                                                       | 3.239572  | -1.937612 | 0.254490  |
| C                                                                           | -3.123890 | 0.511356  | -1.553284 | C                                                                       | 3.456819  | 0.435134  | 0.762584  |
| C                                                                           | -3.564282 | 0.199521  | 1.190065  | C                                                                       | 3.308359  | -2.192977 | 1.613458  |
| H                                                                           | -3.031128 | -1.859346 | 0.892227  | H                                                                       | 3.147526  | -2.749213 | -0.454799 |
| C                                                                           | -3.527269 | 1.602916  | -0.788363 | C                                                                       | 3.517842  | 0.100393  | 2.104472  |
| H                                                                           | -2.970324 | 0.624545  | -2.618648 | H                                                                       | 3.532982  | 1.467334  | 0.448139  |
| C                                                                           | -3.746306 | 1.444372  | 0.579768  | C                                                                       | 3.446962  | -1.202252 | 2.572701  |
| N                                                                           | 2.135262  | -0.074791 | -0.379915 | H                                                                       | 3.504021  | -1.433799 | 3.628447  |
| H                                                                           | 2.865047  | -0.713919 | -0.688836 | F                                                                       | 3.663517  | 1.098631  | 3.015882  |
| C                                                                           | 2.238349  | 1.195579  | -1.130547 | F                                                                       | 3.245910  | -3.484132 | 2.034624  |
| H                                                                           | 1.440628  | 1.852686  | -0.776366 | N                                                                       | -1.802012 | -0.085839 | -0.384804 |
| H                                                                           | 2.036111  | 0.962436  | -2.178477 | H                                                                       | -2.318392 | 0.382432  | -1.126973 |
| C                                                                           | 2.184206  | 0.088055  | 1.089920  | C                                                                       | -2.229766 | -1.498772 | -0.296910 |
| H                                                                           | 3.015556  | 0.749777  | 1.362648  | H                                                                       | -1.655616 | -1.967528 | 0.505669  |
| H                                                                           | 1.259865  | 0.584622  | 1.396085  | H                                                                       | -1.940668 | -1.977121 | -1.235383 |
| C                                                                           | 2.337084  | -1.225228 | 1.824554  | C                                                                       | -1.935442 | 0.665386  | 0.882950  |
| C                                                                           | 3.499654  | -1.993543 | 1.676513  | H                                                                       | -2.928118 | 0.491259  | 1.316052  |
| C                                                                           | 1.338771  | -1.680651 | 2.691426  | H                                                                       | -1.199510 | 0.261728  | 1.582969  |
| C                                                                           | 3.653592  | -3.193346 | 2.368743  | C                                                                       | -1.725378 | 2.152527  | 0.706840  |
| H                                                                           | 4.293223  | -1.648803 | 1.020176  | C                                                                       | -2.630720 | 2.913677  | -0.044396 |
| C                                                                           | 1.493096  | -2.877711 | 3.392443  | C                                                                       | -0.644002 | 2.800845  | 1.311502  |
| H                                                                           | 0.434793  | -1.094297 | 2.819933  | C                                                                       | -2.451134 | 4.287246  | -0.197538 |
| C                                                                           | 2.649431  | -3.639462 | 3.230012  | H                                                                       | -3.484941 | 2.429789  | -0.508705 |
| H                                                                           | 4.559660  | -3.776091 | 2.241896  | C                                                                       | -0.465627 | 4.177630  | 1.167007  |
| H                                                                           | 0.708818  | -3.214988 | 4.061659  | H                                                                       | 0.062980  | 2.225531  | 1.900309  |
| H                                                                           | 2.770212  | -4.571264 | 3.771723  | C                                                                       | -1.366585 | 4.923986  | 0.408708  |
| C                                                                           | 3.578660  | 1.895768  | -1.016571 | H                                                                       | -3.160817 | 4.861658  | -0.783262 |
| C                                                                           | 4.708159  | 1.364902  | -1.654002 | H                                                                       | 0.377985  | 4.664524  | 1.644418  |
| C                                                                           | 3.717723  | 3.074808  | -0.276934 | H                                                                       | -1.228064 | 5.993454  | 0.293009  |
| C                                                                           | 5.947243  | 1.993556  | -1.548136 | C                                                                       | -3.714254 | -1.701031 | -0.061248 |
| H                                                                           | 4.615051  | 0.455595  | -2.240478 | C                                                                       | -4.633567 | -1.436052 | -1.085420 |
| C                                                                           | 4.956924  | 3.709513  | -0.171747 | C                                                                       | -4.195359 | -2.149840 | 1.173171  |
| H                                                                           | 2.850139  | 3.501373  | 0.216542  | C                                                                       | -6.000536 | -1.609609 | -0.877766 |
| C                                                                           | 6.075179  | 3.168942  | -0.804787 | H                                                                       | -4.275381 | -1.096361 | -2.052787 |
| H                                                                           | 6.811308  | 1.571281  | -2.049958 | C                                                                       | -5.564122 | -2.327683 | 1.383763  |
| H                                                                           | 5.046856  | 4.624145  | 0.404516  | H                                                                       | -3.494374 | -2.365254 | 1.973429  |
| H                                                                           | 7.038609  | 3.660484  | -0.724203 | C                                                                       | -6.469993 | -2.056283 | 0.359418  |
| H                                                                           | -3.677480 | 2.563942  | -1.263257 | H                                                                       | -6.699061 | -1.403857 | -1.681788 |
| H                                                                           | -3.744790 | 0.076260  | 2.251644  | H                                                                       | -5.920500 | -2.677880 | 2.346621  |
| C                                                                           | -4.170285 | 2.607893  | 1.426815  | H                                                                       | -7.533521 | -2.194933 | 0.520805  |
| F                                                                           | -4.479771 | 3.706503  | 0.703702  |                                                                         |           |           |           |
| F                                                                           | -5.260635 | 2.324468  | 2.186982  |                                                                         |           |           |           |
| F                                                                           | -3.198071 | 2.988224  | 2.303296  |                                                                         |           |           |           |
| <b>Dibenzylamine Attack to Fluorinated BCBs [SMD(DMSO)/B3LYP/6-311+G**]</b> |           |           |           |                                                                         |           |           |           |
| <b>BCB (TS<sub>N</sub>)</b>                                                 |           |           |           | <b>1-FBCB (TS<sub>1N</sub>)</b>                                         |           |           |           |
| Electronic Energy = -753.382855 au                                          |           |           |           | Electronic Energy = -852.654606 au                                      |           |           |           |
| Enthalpy = -753.022283 au                                                   |           |           |           | Enthalpy = -852.301758 au                                               |           |           |           |
| Gibbs Free Energy = -753.087795 au                                          |           |           |           | Gibbs Free Energy = -852.368893 au                                      |           |           |           |
| Lowest Harmonic Vibrational Frequency (LHVF) = 383.86i cm <sup>-1</sup>     |           |           |           | Lowest Harmonic Vibrational Frequency (LHVF) = 354.20i cm <sup>-1</sup> |           |           |           |
| C                                                                           | -5.081634 | 0.002662  | 0.376115  | C                                                                       | 2.361165  | 3.280251  | 1.030130  |
| C                                                                           | -3.958627 | 1.101306  | 0.316262  | C                                                                       | 2.497628  | 1.773364  | 0.617026  |
| C                                                                           | -3.241210 | -0.044303 | -0.318756 | C                                                                       | 1.168706  | 2.073475  | 0.020920  |
| C                                                                           | -3.969478 | -1.106671 | 0.436642  | C                                                                       | 0.793506  | 3.173314  | 0.948416  |
| H                                                                           | -4.137454 | -2.062968 | -0.062307 | H                                                                       | 0.220491  | 3.995910  | 0.516756  |
| H                                                                           | -3.596628 | -1.270917 | 1.453818  | H                                                                       | 0.323826  | 2.823628  | 1.872175  |
| H                                                                           | -3.338578 | -0.102503 | -1.400279 | H                                                                       | 3.280483  | 1.474115  | -0.081165 |
| H                                                                           | -4.118224 | 1.999173  | -0.283725 | H                                                                       | 2.449245  | 1.073705  | 1.455841  |
| H                                                                           | -3.583763 | 1.371665  | 1.309708  | H                                                                       | 2.705907  | 3.899014  | 0.195143  |

|                                                                                                                                                                                                                     |           |           |           |                                                                                                                                                                                                                    |           |           |           |
|---------------------------------------------------------------------------------------------------------------------------------------------------------------------------------------------------------------------|-----------|-----------|-----------|--------------------------------------------------------------------------------------------------------------------------------------------------------------------------------------------------------------------|-----------|-----------|-----------|
| H                                                                                                                                                                                                                   | -5.581244 | -0.048062 | -0.600128 | N                                                                                                                                                                                                                  | -0.096325 | 0.669214  | -0.140264 |
| N                                                                                                                                                                                                                   | -1.389845 | -0.046429 | -0.212313 | H                                                                                                                                                                                                                  | -0.139733 | 0.329746  | 0.820578  |
| H                                                                                                                                                                                                                   | -1.254174 | 0.017411  | 0.796089  | C                                                                                                                                                                                                                  | -1.416663 | 1.255212  | -0.508671 |
| C                                                                                                                                                                                                                   | -0.884070 | -1.351887 | -0.709667 | H                                                                                                                                                                                                                  | -1.380245 | 1.495578  | -1.571648 |
| H                                                                                                                                                                                                                   | -0.949251 | -1.326429 | -1.798219 | H                                                                                                                                                                                                                  | -1.510938 | 2.190284  | 0.047000  |
| H                                                                                                                                                                                                                   | -1.592410 | -2.103918 | -0.351516 | C                                                                                                                                                                                                                  | 0.334790  | -0.433241 | -1.043975 |
| C                                                                                                                                                                                                                   | -0.863136 | 1.174801  | -0.875706 | H                                                                                                                                                                                                                  | -0.534655 | -1.063367 | -1.255886 |
| H                                                                                                                                                                                                                   | -0.820912 | 0.970585  | -1.946283 | H                                                                                                                                                                                                                  | 0.648144  | 0.022355  | -1.984421 |
| H                                                                                                                                                                                                                   | -1.615235 | 1.953372  | -0.717200 | C                                                                                                                                                                                                                  | 1.441897  | -1.288540 | -0.471744 |
| C                                                                                                                                                                                                                   | 0.476713  | 1.676187  | -0.378057 | C                                                                                                                                                                                                                  | 2.658273  | -1.418495 | -1.148826 |
| C                                                                                                                                                                                                                   | 1.558963  | 1.806724  | -1.253453 | C                                                                                                                                                                                                                  | 1.251709  | -2.005571 | 0.716822  |
| C                                                                                                                                                                                                                   | 0.637819  | 2.073990  | 0.955619  | C                                                                                                                                                                                                                  | 3.666307  | -2.244548 | -0.650109 |
| C                                                                                                                                                                                                                   | 2.778712  | 2.318350  | -0.807652 | H                                                                                                                                                                                                                  | 2.817354  | -0.870526 | -2.071756 |
| H                                                                                                                                                                                                                   | 1.446395  | 1.508187  | -2.290657 | C                                                                                                                                                                                                                  | 2.260348  | -2.823802 | 1.221987  |
| C                                                                                                                                                                                                                   | 1.856592  | 2.576998  | 1.405715  | H                                                                                                                                                                                                                  | 0.308210  | -1.929807 | 1.249082  |
| H                                                                                                                                                                                                                   | -0.196130 | 1.993444  | 1.646543  | C                                                                                                                                                                                                                  | 3.471587  | -2.946298 | 0.538804  |
| C                                                                                                                                                                                                                   | 2.932037  | 2.701923  | 0.523806  | H                                                                                                                                                                                                                  | 4.603433  | -2.335380 | -1.188639 |
| H                                                                                                                                                                                                                   | 3.607794  | 2.414062  | -1.500564 | H                                                                                                                                                                                                                  | 2.098242  | -3.371189 | 2.144242  |
| H                                                                                                                                                                                                                   | 1.965179  | 2.879069  | 2.441860  | H                                                                                                                                                                                                                  | 4.255255  | -3.586127 | 0.929568  |
| H                                                                                                                                                                                                                   | 3.879717  | 3.097500  | 0.872583  | C                                                                                                                                                                                                                  | -2.593505 | 0.354334  | -0.205052 |
| C                                                                                                                                                                                                                   | 0.513952  | -1.737576 | -0.274164 | C                                                                                                                                                                                                                  | -3.004581 | 0.152715  | 1.119538  |
| C                                                                                                                                                                                                                   | 1.530664  | -1.912123 | -1.217874 | C                                                                                                                                                                                                                  | -3.295402 | -0.283939 | -1.233220 |
| C                                                                                                                                                                                                                   | 0.799222  | -1.978357 | 1.076296  | C                                                                                                                                                                                                                  | -4.086578 | -0.675891 | 1.409154  |
| C                                                                                                                                                                                                                   | 2.808327  | -2.312259 | -0.823447 | H                                                                                                                                                                                                                  | -2.477700 | 0.652150  | 1.927060  |
| H                                                                                                                                                                                                                   | 1.320705  | -1.736305 | -2.267982 | C                                                                                                                                                                                                                  | -4.382271 | -1.111342 | -0.945769 |
| C                                                                                                                                                                                                                   | 2.075476  | -2.370631 | 1.473992  | H                                                                                                                                                                                                                  | -2.993772 | -0.127258 | -2.263819 |
| H                                                                                                                                                                                                                   | 0.016847  | -1.861298 | 1.820325  | C                                                                                                                                                                                                                  | -4.778455 | -1.311268 | 0.375802  |
| C                                                                                                                                                                                                                   | 3.085039  | -2.539310 | 0.523794  | H                                                                                                                                                                                                                  | -4.395104 | -0.820035 | 2.438973  |
| H                                                                                                                                                                                                                   | 3.585571  | -2.444156 | -1.568565 | H                                                                                                                                                                                                                  | -4.917813 | -1.597430 | -1.754085 |
| H                                                                                                                                                                                                                   | 2.281017  | -2.552785 | 2.523362  | H                                                                                                                                                                                                                  | -5.623378 | -1.952959 | 0.600688  |
| H                                                                                                                                                                                                                   | 4.077531  | -2.849067 | 0.832532  | F                                                                                                                                                                                                                  | 1.205139  | 2.432746  | -1.310138 |
| <b>1-FBCB (TS<sub>2N</sub>)</b><br>Electronic Energy = -852.656219 au<br>Enthalpy = -852.303699 au<br>Gibbs Free Energy = -852.373955 au<br>Lowest Harmonic Vibrational Frequency (LHVF) = 334.09i cm <sup>-1</sup> |           |           |           | <b>2-FBCB (TS<sub>N</sub>)</b><br>Electronic Energy = -951.930541 au<br>Enthalpy = -951.585739 au<br>Gibbs Free Energy = -951.656327 au<br>Lowest Harmonic Vibrational Frequency (LHVF) = 230.92i cm <sup>-1</sup> |           |           |           |
| C                                                                                                                                                                                                                   | 2.624514  | -3.279223 | 0.212122  | C                                                                                                                                                                                                                  | 2.858975  | -2.579585 | -1.048319 |
| C                                                                                                                                                                                                                   | 1.883534  | -2.573528 | -0.988584 | C                                                                                                                                                                                                                  | 2.676233  | -1.068516 | -0.665503 |
| C                                                                                                                                                                                                                   | 1.530149  | -1.690406 | 0.141852  | C                                                                                                                                                                                                                  | 1.447526  | -1.615503 | -0.041881 |
| C                                                                                                                                                                                                                   | 1.579525  | -2.685901 | 1.232636  | C                                                                                                                                                                                                                  | 1.312718  | -2.827712 | -0.883959 |
| H                                                                                                                                                                                                                   | 1.927001  | -2.349948 | 2.209231  | H                                                                                                                                                                                                                  | 0.976229  | -3.737535 | -0.388418 |
| H                                                                                                                                                                                                                   | 0.737104  | -3.371278 | 1.323948  | H                                                                                                                                                                                                                  | 0.795731  | -2.670048 | -1.829029 |
| H                                                                                                                                                                                                                   | 2.478424  | -2.151822 | -1.797884 | H                                                                                                                                                                                                                  | 3.399357  | -0.603862 | 0.002729  |
| H                                                                                                                                                                                                                   | 1.104750  | -3.234310 | -1.368776 | H                                                                                                                                                                                                                  | 2.502141  | -0.460551 | -1.551588 |
| H                                                                                                                                                                                                                   | -0.190919 | -0.113893 | 0.932681  | H                                                                                                                                                                                                                  | -0.292087 | -0.119872 | -0.896771 |
| N                                                                                                                                                                                                                   | -0.107789 | -0.490852 | -0.010211 | N                                                                                                                                                                                                                  | -0.211407 | -0.435502 | 0.068381  |
| C                                                                                                                                                                                                                   | 0.092714  | 0.607947  | -0.984276 | C                                                                                                                                                                                                                  | -1.358119 | -1.314475 | 0.402180  |
| H                                                                                                                                                                                                                   | -0.868620 | 1.084806  | -1.206040 | H                                                                                                                                                                                                                  | -1.256513 | -1.601107 | 1.450371  |
| H                                                                                                                                                                                                                   | 0.459629  | 0.158630  | -1.910690 | H                                                                                                                                                                                                                  | -1.252810 | -2.216752 | -0.204537 |
| C                                                                                                                                                                                                                   | -1.268257 | -1.362020 | -0.302648 | C                                                                                                                                                                                                                  | -0.053389 | 0.723518  | 0.979006  |
| H                                                                                                                                                                                                                   | -1.159159 | -1.720565 | -1.327968 | H                                                                                                                                                                                                                  | -1.031733 | 1.191170  | 1.137769  |
| H                                                                                                                                                                                                                   | -1.190257 | -2.223823 | 0.363948  | H                                                                                                                                                                                                                  | 0.284416  | 0.337711  | 1.943039  |
| C                                                                                                                                                                                                                   | -2.617098 | -0.695073 | -0.121816 | C                                                                                                                                                                                                                  | 0.916027  | 1.760521  | 0.458787  |
| C                                                                                                                                                                                                                   | -3.399113 | -0.335980 | -1.224794 | C                                                                                                                                                                                                                  | 0.629479  | 2.482352  | -0.707627 |
| C                                                                                                                                                                                                                   | -3.104421 | -0.425624 | 1.164397  | C                                                                                                                                                                                                                  | 2.096534  | 2.044493  | 1.152267  |
| C                                                                                                                                                                                                                   | -4.638382 | 0.282926  | -1.049863 | C                                                                                                                                                                                                                  | 1.509760  | 3.456053  | -1.175626 |
| H                                                                                                                                                                                                                   | -3.038559 | -0.546553 | -2.226630 | H                                                                                                                                                                                                                  | -0.290161 | 2.284615  | -1.250480 |
| C                                                                                                                                                                                                                   | -4.339578 | 0.194374  | 1.342463  | C                                                                                                                                                                                                                  | 2.975699  | 3.025323  | 0.690879  |
| H                                                                                                                                                                                                                   | -2.514678 | -0.708038 | 2.031530  | H                                                                                                                                                                                                                  | 2.328570  | 1.495447  | 2.059014  |

|                                                                         |           |           |           |                                                                         |           |           |           |
|-------------------------------------------------------------------------|-----------|-----------|-----------|-------------------------------------------------------------------------|-----------|-----------|-----------|
| C                                                                       | -5.110515 | 0.551506  | 0.234022  | C                                                                       | 2.686564  | 3.730834  | -0.476388 |
| H                                                                       | -5.232795 | 0.553352  | -1.916040 | H                                                                       | 1.274048  | 4.005618  | -2.080619 |
| H                                                                       | -4.704321 | 0.392613  | 2.344647  | H                                                                       | 3.886348  | 3.234643  | 1.241825  |
| H                                                                       | -6.073382 | 1.031261  | 0.372098  | H                                                                       | 3.370043  | 4.491407  | -0.837871 |
| C                                                                       | 1.066179  | 1.650273  | -0.482750 | C                                                                       | -2.716869 | -0.690291 | 0.158111  |
| C                                                                       | 2.341916  | 1.773482  | -1.042629 | C                                                                       | -3.184147 | -0.503204 | -1.149856 |
| C                                                                       | 0.696508  | 2.522935  | 0.549514  | C                                                                       | -3.528151 | -0.291656 | 1.225786  |
| C                                                                       | 3.232283  | 2.743955  | -0.580374 | C                                                                       | -4.429547 | 0.076306  | -1.383941 |
| H                                                                       | 2.639375  | 1.108360  | -1.846658 | H                                                                       | -2.570866 | -0.817950 | -1.989027 |
| C                                                                       | 1.585684  | 3.488690  | 1.017554  | C                                                                       | -4.777972 | 0.285693  | 0.994340  |
| H                                                                       | -0.295213 | 2.449135  | 0.985515  | H                                                                       | -3.181874 | -0.438524 | 2.243836  |
| C                                                                       | 2.857564  | 3.601675  | 0.453018  | C                                                                       | -5.230394 | 0.473323  | -0.310880 |
| H                                                                       | 4.217221  | 2.827877  | -1.026911 | H                                                                       | -4.778940 | 0.211701  | -2.401888 |
| H                                                                       | 1.284317  | 4.156995  | 1.816987  | H                                                                       | -5.395808 | 0.587446  | 1.833310  |
| H                                                                       | 3.548833  | 4.355314  | 0.814217  | H                                                                       | -6.201256 | 0.921408  | -0.492459 |
| F                                                                       | 3.925782  | -2.624555 | 0.422861  | F                                                                       | 1.569860  | -1.876478 | 1.292049  |
| H                                                                       | 2.214498  | -0.861194 | 0.279464  | F                                                                       | 3.533413  | -3.240335 | 0.066603  |
| <b>3-FBCB (TS1<sub>N</sub>)</b>                                         |           |           |           | <b>3-FBCB (TS2<sub>N</sub>)</b>                                         |           |           |           |
| Electronic Energy = -1051.193599 au                                     |           |           |           | Electronic Energy = -1051.203868 au                                     |           |           |           |
| Enthalpy = -1050.855652 au                                              |           |           |           | Enthalpy = -1050.865811 au                                              |           |           |           |
| Gibbs Free Energy = -1050.929174 au                                     |           |           |           | Gibbs Free Energy = -1050.940241 au                                     |           |           |           |
| Lowest Harmonic Vibrational Frequency (LHVF) = 188.96i cm <sup>-1</sup> |           |           |           | Lowest Harmonic Vibrational Frequency (LHVF) = 240.79i cm <sup>-1</sup> |           |           |           |
| C                                                                       | 3.064308  | -2.177823 | -0.961309 | C                                                                       | 2.837692  | -2.552773 | -0.202373 |
| C                                                                       | 2.712013  | -0.677135 | -0.712827 | C                                                                       | 1.686575  | -2.612964 | -1.156736 |
| C                                                                       | 1.545464  | -1.295025 | -0.037136 | C                                                                       | 1.762088  | -1.252349 | -0.527311 |
| C                                                                       | 1.545618  | -2.561070 | -0.824367 | C                                                                       | 2.468085  | -1.531341 | 0.709752  |
| H                                                                       | 3.378158  | -0.102376 | -0.071906 | H                                                                       | 1.947383  | -2.624690 | -2.218269 |
| H                                                                       | 2.487344  | -0.149712 | -1.637578 | H                                                                       | 0.843423  | -3.264970 | -0.933609 |
| H                                                                       | -0.382823 | 0.055398  | -0.934420 | H                                                                       | -0.385008 | 0.091430  | -1.144009 |
| C                                                                       | -1.360193 | -1.212089 | 0.363939  | C                                                                       | -1.242697 | -1.413306 | -0.048804 |
| H                                                                       | -1.225495 | -1.510825 | 1.405418  | H                                                                       | -1.012263 | -1.928950 | 0.886501  |
| N                                                                       | -0.291101 | -0.240124 | 0.035782  | N                                                                       | -0.227925 | -0.355130 | -0.242753 |
| H                                                                       | -1.193726 | -2.091424 | -0.262124 | H                                                                       | -1.112156 | -2.129064 | -0.862897 |
| C                                                                       | -0.246169 | 0.938190  | 0.930381  | C                                                                       | -0.232186 | 0.669322  | 0.826101  |
| H                                                                       | -1.254964 | 1.354971  | 1.036534  | H                                                                       | -1.263018 | 0.951521  | 1.075394  |
| H                                                                       | 0.067145  | 0.589860  | 1.916965  | H                                                                       | 0.204012  | 0.216013  | 1.719377  |
| C                                                                       | 0.689653  | 2.017951  | 0.435594  | C                                                                       | 0.535455  | 1.918238  | 0.452346  |
| C                                                                       | 1.829550  | 2.365485  | 1.167219  | C                                                                       | 0.088669  | 2.743257  | -0.588763 |
| C                                                                       | 0.413277  | 2.712084  | -0.749926 | C                                                                       | 1.686834  | 2.290884  | 1.153121  |
| C                                                                       | 2.677996  | 3.381908  | 0.725490  | C                                                                       | 0.781977  | 3.903800  | -0.927526 |
| H                                                                       | 2.053879  | 1.838080  | 2.088671  | H                                                                       | -0.811480 | 2.478797  | -1.135872 |
| C                                                                       | 1.263100  | 3.721579  | -1.198142 | C                                                                       | 2.379913  | 3.456622  | 0.821793  |
| H                                                                       | -0.475425 | 2.465358  | -1.323330 | H                                                                       | 2.042403  | 1.666406  | 1.966088  |
| C                                                                       | 2.399028  | 4.060069  | -0.460321 | C                                                                       | 1.931858  | 4.264505  | -0.222314 |
| H                                                                       | 3.556840  | 3.640409  | 1.306400  | H                                                                       | 0.421672  | 4.530347  | -1.736526 |
| H                                                                       | 1.035092  | 4.249277  | -2.118048 | H                                                                       | 3.270053  | 3.730444  | 1.378186  |
| H                                                                       | 3.058329  | 4.848732  | -0.806236 | H                                                                       | 2.470454  | 5.169134  | -0.483061 |
| C                                                                       | -2.768322 | -0.694227 | 0.146477  | C                                                                       | -2.686150 | -0.940718 | -0.033034 |
| C                                                                       | -3.263736 | -0.524155 | -1.153152 | C                                                                       | -3.446448 | -0.975127 | 1.140453  |
| C                                                                       | -3.594917 | -0.374018 | 1.228520  | C                                                                       | -3.284845 | -0.461464 | -1.206008 |
| C                                                                       | -4.552979 | -0.039664 | -1.365414 | C                                                                       | -4.773239 | -0.539567 | 1.146223  |
| H                                                                       | -2.637846 | -0.778458 | -2.003485 | H                                                                       | -2.997709 | -1.347911 | 2.055936  |
| C                                                                       | -4.888050 | 0.108676  | 1.019353  | C                                                                       | -4.607607 | -0.022958 | -1.204183 |
| H                                                                       | -3.225968 | -0.507221 | 2.240505  | H                                                                       | -2.711650 | -0.435793 | -2.128246 |
| C                                                                       | -5.369237 | 0.279095  | -0.278004 | C                                                                       | -5.356486 | -0.060349 | -0.025785 |
| H                                                                       | -4.923853 | 0.082611  | -2.377429 | H                                                                       | -5.348285 | -0.573693 | 2.065477  |
| H                                                                       | -5.517050 | 0.350825  | 1.869309  | H                                                                       | -5.056885 | 0.341947  | -2.121734 |
| H                                                                       | -6.373978 | 0.653055  | -0.442255 | H                                                                       | -6.386817 | 0.278418  | -0.023946 |
| F                                                                       | 1.685212  | -1.478745 | 1.295341  | F                                                                       | 2.128930  | -0.189697 | -1.288918 |

|                                                                                                                                                                                                                           |           |           |           |                                                                                                                                                                                                                           |           |           |           |
|---------------------------------------------------------------------------------------------------------------------------------------------------------------------------------------------------------------------------|-----------|-----------|-----------|---------------------------------------------------------------------------------------------------------------------------------------------------------------------------------------------------------------------------|-----------|-----------|-----------|
| F                                                                                                                                                                                                                         | 3.767978  | -2.691188 | 0.178495  | F                                                                                                                                                                                                                         | 4.113273  | -2.929513 | -0.501262 |
| F                                                                                                                                                                                                                         | 1.214914  | -3.713891 | -0.142667 | F                                                                                                                                                                                                                         | 1.659435  | -1.897200 | 1.968346  |
| H                                                                                                                                                                                                                         | 1.020684  | -2.532265 | -1.776219 | H                                                                                                                                                                                                                         | 3.189685  | -0.818057 | 1.095275  |
| <b>4-FBCB (TS1<sub>N</sub>)</b><br>Electronic Energy = -1150.474129 au<br>Enthalpy = -1150.143142 au<br>Gibbs Free Energy = -1150.221313 au<br>Lowest Harmonic Vibrational Frequency (LHVF) =<br>116.08i cm <sup>-1</sup> |           |           |           | <b>4-FBCB (TS2<sub>N</sub>)</b><br>Electronic Energy = -1150.485479 au<br>Enthalpy = -1150.154236 au<br>Gibbs Free Energy = -1150.229398 au<br>Lowest Harmonic Vibrational Frequency (LHVF) =<br>219.16i cm <sup>-1</sup> |           |           |           |
| C                                                                                                                                                                                                                         | -2.016229 | -2.077180 | 1.018036  | C                                                                                                                                                                                                                         | -2.724238 | -2.328077 | -0.335537 |
| C                                                                                                                                                                                                                         | -2.461327 | -0.768809 | 0.579830  | C                                                                                                                                                                                                                         | -1.392716 | -2.760009 | -0.005550 |
| C                                                                                                                                                                                                                         | -1.773418 | -1.270138 | -0.617012 | C                                                                                                                                                                                                                         | -1.506034 | -1.409156 | 0.584917  |
| C                                                                                                                                                                                                                         | -1.630912 | -2.675915 | -0.238191 | C                                                                                                                                                                                                                         | -2.625127 | -0.892382 | -0.232655 |
| H                                                                                                                                                                                                                         | -2.171140 | 0.158271  | 1.066451  | H                                                                                                                                                                                                                         | -1.219609 | -3.612245 | 0.647962  |
| H                                                                                                                                                                                                                         | 0.432323  | -0.052589 | 0.733101  | F                                                                                                                                                                                                                         | -0.428918 | -2.944909 | -1.106813 |
| C                                                                                                                                                                                                                         | 1.508142  | -1.171930 | -0.610075 | H                                                                                                                                                                                                                         | 0.366755  | -0.102113 | -0.684431 |
| H                                                                                                                                                                                                                         | 1.459474  | -1.360274 | -1.685572 | C                                                                                                                                                                                                                         | 0.367731  | 1.040401  | 1.039397  |
| H                                                                                                                                                                                                                         | 1.260580  | -2.104378 | -0.097174 | H                                                                                                                                                                                                                         | 1.378766  | 1.463654  | 1.008132  |
| N                                                                                                                                                                                                                         | 0.449200  | -0.199187 | -0.274147 | N                                                                                                                                                                                                                         | 0.352789  | -0.257602 | 0.321712  |
| C                                                                                                                                                                                                                         | 0.580468  | 1.096671  | -0.969543 | H                                                                                                                                                                                                                         | 0.133423  | 0.835580  | 2.086250  |
| H                                                                                                                                                                                                                         | 1.606745  | 1.478584  | -0.883557 | C                                                                                                                                                                                                                         | 1.481685  | -1.136572 | 0.708524  |
| H                                                                                                                                                                                                                         | 0.388998  | 0.923734  | -2.031750 | H                                                                                                                                                                                                                         | 1.452459  | -1.248782 | 1.794565  |
| C                                                                                                                                                                                                                         | -0.376660 | 2.136796  | -0.432033 | H                                                                                                                                                                                                                         | 1.294705  | -2.115253 | 0.264483  |
| C                                                                                                                                                                                                                         | -1.480078 | 2.559476  | -1.180471 | C                                                                                                                                                                                                                         | 2.849512  | -0.642208 | 0.275691  |
| C                                                                                                                                                                                                                         | -0.164982 | 2.705802  | 0.831207  | C                                                                                                                                                                                                                         | 3.207737  | -0.656161 | -1.079238 |
| C                                                                                                                                                                                                                         | -2.355651 | 3.524241  | -0.679277 | C                                                                                                                                                                                                                         | 3.777051  | -0.168590 | 1.209466  |
| H                                                                                                                                                                                                                         | -1.653854 | 2.134084  | -2.163278 | C                                                                                                                                                                                                                         | 4.459108  | -0.201033 | -1.490142 |
| C                                                                                                                                                                                                                         | -1.041186 | 3.664130  | 1.337994  | H                                                                                                                                                                                                                         | 2.502959  | -1.029622 | -1.816281 |
| H                                                                                                                                                                                                                         | 0.695372  | 2.400537  | 1.419397  | C                                                                                                                                                                                                                         | 5.033164  | 0.284979  | 0.801876  |
| C                                                                                                                                                                                                                         | -2.140852 | 4.076312  | 0.582917  | H                                                                                                                                                                                                                         | 3.516556  | -0.157617 | 2.263123  |
| H                                                                                                                                                                                                                         | -3.204928 | 3.842027  | -1.274721 | C                                                                                                                                                                                                                         | 5.376404  | 0.271925  | -0.549212 |
| H                                                                                                                                                                                                                         | -0.862215 | 4.094801  | 2.317423  | H                                                                                                                                                                                                                         | 4.721675  | -0.220997 | -2.542491 |
| H                                                                                                                                                                                                                         | -2.821182 | 4.824873  | 0.974346  | H                                                                                                                                                                                                                         | 5.740600  | 0.648519  | 1.539557  |
| C                                                                                                                                                                                                                         | 2.919517  | -0.757703 | -0.227301 | H                                                                                                                                                                                                                         | 6.351524  | 0.623874  | -0.868076 |
| C                                                                                                                                                                                                                         | 3.301562  | -0.713240 | 1.120166  | C                                                                                                                                                                                                                         | -0.603779 | 2.051241  | 0.475459  |
| C                                                                                                                                                                                                                         | 3.860927  | -0.411189 | -1.202025 | C                                                                                                                                                                                                                         | -0.318132 | 2.711087  | -0.726962 |
| C                                                                                                                                                                                                                         | 4.590231  | -0.326835 | 1.483904  | C                                                                                                                                                                                                                         | -1.787902 | 2.365931  | 1.149434  |
| H                                                                                                                                                                                                                         | 2.585669  | -0.987124 | 1.889714  | C                                                                                                                                                                                                                         | -1.202180 | 3.652953  | -1.249887 |
| C                                                                                                                                                                                                                         | 5.154054  | -0.026214 | -0.842154 | H                                                                                                                                                                                                                         | 0.604240  | 2.488004  | -1.254777 |
| H                                                                                                                                                                                                                         | 3.581261  | -0.445781 | -2.250395 | C                                                                                                                                                                                                                         | -2.673114 | 3.312717  | 0.631583  |
| C                                                                                                                                                                                                                         | 5.521281  | 0.018949  | 0.502001  | H                                                                                                                                                                                                                         | -2.017744 | 1.870114  | 2.086961  |
| H                                                                                                                                                                                                                         | 4.870838  | -0.301243 | 2.531514  | C                                                                                                                                                                                                                         | -2.384167 | 3.955963  | -0.571345 |
| H                                                                                                                                                                                                                         | 5.871707  | 0.238194  | -1.611506 | H                                                                                                                                                                                                                         | -0.966543 | 4.155414  | -2.181964 |
| H                                                                                                                                                                                                                         | 6.525306  | 0.317078  | 0.783899  | H                                                                                                                                                                                                                         | -3.586294 | 3.547220  | 1.168206  |
| F                                                                                                                                                                                                                         | -1.728003 | -0.756061 | -1.828821 | H                                                                                                                                                                                                                         | -3.071045 | 4.691858  | -0.975211 |
| F                                                                                                                                                                                                                         | -1.999614 | -2.594336 | 2.240251  | F                                                                                                                                                                                                                         | -1.464549 | -1.227045 | 1.916370  |
| F                                                                                                                                                                                                                         | -2.658428 | -3.608855 | -0.864997 | F                                                                                                                                                                                                                         | -3.851424 | -3.075874 | -0.356561 |
| H                                                                                                                                                                                                                         | -0.716888 | -3.241368 | -0.394084 | F                                                                                                                                                                                                                         | -2.285719 | -0.134635 | -1.436689 |
| F                                                                                                                                                                                                                         | -3.943042 | -0.599023 | 0.436611  | H                                                                                                                                                                                                                         | -3.406488 | -0.310259 | 0.250335  |
| <b>5-FBCB (TS1<sub>N</sub>)</b><br>Electronic Energy = -1249.753879 au<br>Enthalpy = -1249.430182 au<br>Gibbs Free Energy = -1249.508315 au<br>Lowest Harmonic Vibrational Frequency (LHVF) =<br>139.48i cm <sup>-1</sup> |           |           |           | <b>5-FBCB (TS2<sub>N</sub>)</b><br>Electronic Energy = -1249.752161 au<br>Enthalpy = -1249.428384 au<br>Gibbs Free Energy = -1249.506033 au<br>Lowest Harmonic Vibrational Frequency (LHVF) =<br>93.35i cm <sup>-1</sup>  |           |           |           |
| C                                                                                                                                                                                                                         | -2.691360 | -2.285872 | -0.397125 | C                                                                                                                                                                                                                         | 4.151298  | -0.410738 | -0.372022 |
| C                                                                                                                                                                                                                         | -1.354129 | -2.729595 | -0.081641 | C                                                                                                                                                                                                                         | 3.195655  | -1.413741 | 0.052390  |
| C                                                                                                                                                                                                                         | -1.469272 | -1.415205 | 0.572641  | C                                                                                                                                                                                                                         | 2.741954  | -0.148280 | 0.640359  |
| C                                                                                                                                                                                                                         | -2.564451 | -0.851553 | -0.243322 | C                                                                                                                                                                                                                         | 3.354560  | 0.799747  | -0.302748 |
| H                                                                                                                                                                                                                         | -1.203167 | -3.610360 | 0.539044  | F                                                                                                                                                                                                                         | 2.363136  | -2.039981 | -0.943063 |

|                                                |           |           |           |   |           |           |           |
|------------------------------------------------|-----------|-----------|-----------|---|-----------|-----------|-----------|
| F                                              | -0.404428 | -2.859330 | -1.171929 | H | 3.516494  | -2.210029 | 0.720414  |
| H                                              | 0.593297  | -0.070445 | -0.738534 | H | 0.296931  | -0.170959 | -0.706527 |
| C                                              | 0.631632  | 1.074455  | 0.976803  | C | -0.142827 | 1.331255  | 0.642786  |
| H                                              | 1.651788  | 1.477811  | 0.931456  | H | 0.583961  | 2.028719  | 0.213553  |
| N                                              | 0.563089  | -0.222119 | 0.267422  | N | 0.317350  | -0.022171 | 0.298057  |
| H                                              | 0.406325  | 0.884967  | 2.029291  | H | -0.079810 | 1.432765  | 1.728953  |
| C                                              | 1.644413  | -1.151683 | 0.660189  | C | -0.308742 | -1.147421 | 1.010895  |
| H                                              | 1.589205  | -1.282882 | 1.743672  | H | 0.398405  | -1.983667 | 0.976801  |
| H                                              | 1.425264  | -2.115069 | 0.196310  | H | -0.411757 | -0.859186 | 2.059386  |
| C                                              | 3.045572  | -0.715775 | 0.268262  | C | -1.647878 | -1.643283 | 0.486260  |
| C                                              | 3.437250  | -0.729335 | -1.077385 | C | -1.755806 | -2.148613 | -0.816236 |
| C                                              | 3.969240  | -0.292058 | 1.229623  | C | -2.784498 | -1.648800 | 1.300448  |
| C                                              | 4.716712  | -0.323625 | -1.452339 | C | -2.970221 | -2.636555 | -1.294782 |
| H                                              | 2.735984  | -1.064034 | -1.836179 | H | -0.882251 | -2.163116 | -1.461471 |
| C                                              | 5.253097  | 0.112881  | 0.858518  | C | -4.002611 | -2.140911 | 0.827005  |
| H                                              | 3.683164  | -0.281532 | 2.276753  | H | -2.716922 | -1.265231 | 2.313692  |
| C                                              | 5.629405  | 0.100049  | -0.483795 | C | -4.099769 | -2.633983 | -0.473324 |
| H                                              | 5.004565  | -0.343535 | -2.498105 | H | -3.035112 | -3.023843 | -2.306170 |
| H                                              | 5.956407  | 0.438431  | 1.617629  | H | -4.873892 | -2.136012 | 1.473511  |
| H                                              | 6.626186  | 0.413768  | -0.774407 | H | -5.045034 | -3.015346 | -0.844096 |
| C                                              | -0.324258 | 2.104804  | 0.421673  | C | -1.532832 | 1.746727  | 0.182958  |
| C                                              | -1.466758 | 2.483746  | 1.133316  | C | -1.858708 | 1.770801  | -1.179479 |
| C                                              | -0.067526 | 2.717060  | -0.812537 | C | -2.497734 | 2.157696  | 1.107579  |
| C                                              | -2.337966 | 3.448267  | 0.624046  | C | -3.118911 | 2.186265  | -1.604559 |
| H                                              | -1.674406 | 2.024058  | 2.094252  | H | -1.120215 | 1.462902  | -1.913836 |
| C                                              | -0.938674 | 3.675002  | -1.327622 | C | -3.760702 | 2.579242  | 0.686348  |
| H                                              | 0.823056  | 2.444786  | -1.371139 | H | -2.259440 | 2.148435  | 2.166778  |
| C                                              | -2.078261 | 4.043469  | -0.609590 | C | -4.075701 | 2.592703  | -0.671412 |
| H                                              | -3.218580 | 3.732042  | 1.190500  | H | -3.354121 | 2.198621  | -2.663625 |
| H                                              | -0.725664 | 4.139537  | -2.284543 | H | -4.496453 | 2.894225  | 1.418850  |
| H                                              | -2.754694 | 4.792170  | -1.007569 | H | -5.056061 | 2.918406  | -1.002028 |
| F                                              | -1.357428 | -1.216269 | 1.880592  | F | 2.555572  | 0.086875  | 1.930591  |
| F                                              | -3.820569 | -3.000699 | -0.447102 | F | 5.479434  | -0.507457 | -0.461999 |
| F                                              | -2.308189 | -0.010213 | -1.322432 | F | 3.945550  | 1.908067  | 0.248655  |
| F                                              | -3.561424 | -0.204051 | 0.445463  | F | 2.655714  | 1.302036  | -1.395893 |
| <b>Perfluoro-FBCB (TS<sub>N</sub>)</b>         |           |           |           |   |           |           |           |
| Electronic Energy = -1349.018381 au            |           |           |           |   |           |           |           |
| Enthalpy = -1348.702155 au                     |           |           |           |   |           |           |           |
| Gibbs Free Energy = -1348.781774 au            |           |           |           |   |           |           |           |
| Lowest Harmonic Vibrational Frequency (LHVF) = |           |           |           |   |           |           |           |
| 88.99i cm <sup>-1</sup>                        |           |           |           |   |           |           |           |
| C                                              | 2.931469  | -1.788268 | -0.606747 |   |           |           |           |
| C                                              | 2.620002  | -0.397825 | -0.333283 |   |           |           |           |
| C                                              | 1.659654  | -1.103561 | 0.534511  |   |           |           |           |
| C                                              | 1.726557  | -2.425232 | -0.115085 |   |           |           |           |
| F                                              | 3.587111  | 0.339680  | 0.311576  |   |           |           |           |
| F                                              | 2.182014  | 0.448434  | -1.339103 |   |           |           |           |
| H                                              | -0.732788 | 0.085371  | -0.825443 |   |           |           |           |
| C                                              | -1.667777 | -1.180903 | 0.497896  |   |           |           |           |
| H                                              | -1.577210 | -1.396229 | 1.565927  |   |           |           |           |
| N                                              | -0.698388 | -0.115191 | 0.171465  |   |           |           |           |
| H                                              | -1.357920 | -2.075002 | -0.045945 |   |           |           |           |
| C                                              | -0.913980 | 1.126657  | 0.941942  |   |           |           |           |
| H                                              | -1.965790 | 1.439000  | 0.885077  |   |           |           |           |
| H                                              | -0.700898 | 0.906078  | 1.991366  |   |           |           |           |
| C                                              | -0.040981 | 2.265385  | 0.467411  |   |           |           |           |
| C                                              | -0.333953 | 2.929058  | -0.731631 |   |           |           |           |
| C                                              | 1.063898  | 2.687036  | 1.213994  |   |           |           |           |
| C                                              | 0.464863  | 3.980088  | -1.178397 |   |           |           |           |
| H                                              | -1.196765 | 2.623733  | -1.316129 |   |           |           |           |

|   |           |           |           |
|---|-----------|-----------|-----------|
| C | 1.862460  | 3.743749  | 0.773257  |
| H | 1.298937  | 2.187929  | 2.148610  |
| C | 1.567274  | 4.390536  | -0.426066 |
| H | 0.224205  | 4.483534  | -2.108746 |
| H | 2.714433  | 4.059254  | 1.366130  |
| H | 2.187268  | 5.211140  | -0.770645 |
| C | -3.117464 | -0.868949 | 0.164379  |
| C | -3.531877 | -0.785408 | -1.171860 |
| C | -4.063734 | -0.656660 | 1.172285  |
| C | -4.856357 | -0.492413 | -1.491534 |
| H | -2.812165 | -0.954227 | -1.967665 |
| C | -5.392656 | -0.365921 | 0.856782  |
| H | -3.759007 | -0.721569 | 2.212233  |
| C | -5.792052 | -0.281407 | -0.476259 |
| H | -5.160961 | -0.434777 | -2.531179 |
| H | -6.113145 | -0.204982 | 1.651748  |
| H | -6.823670 | -0.055908 | -0.723922 |
| F | 1.466652  | -0.888650 | 1.812867  |
| F | 4.102510  | -2.332042 | -0.886833 |
| F | 0.727733  | -2.841069 | -0.987831 |
| F | 1.884216  | -3.504441 | 0.724742  |
